# Supplementary material for: Analysis of Exchange Rates as Time-Inhomogeneous Markov Chain with Finite States
Source: Hindawi journal article supplement (doi:10.1155/2022/3524808), 2022-02-22
Supplement: f1 [file 3524808.f1.docx]

Exchange rate Data

| **DATE** | **USD** | **POUND** | **EURO** |
| --- | --- | --- | --- |
| 3-Jan-12 | 1.5841 | 2.4662 | 2.0601 |
| 4-Jan-12 | 1.5841 | 2.4484 | 2.0396 |
| 5-Jan-12 | 1.5859 | 2.4744 | 2.0498 |
| 6-Jan-12 | 1.5880 | 2.4603 | 2.0282 |
| 9-Jan-12 | 1.5884 | 2.4332 | 2.0243 |
| 10-Jan-12 | 1.5884 | 2.4577 | 2.0313 |
| 11-Jan-12 | 1.5889 | 2.4579 | 2.0275 |
| 12-Jan-12 | 1.5893 | 2.4339 | 2.0206 |
| 13-Jan-12 | 1.5916 | 2.4499 | 2.0487 |
| 16-Jan-12 | 1.5916 | 2.4375 | 2.0139 |
| 17-Jan-12 | 1.5939 | 2.4499 | 2.0283 |
| 18-Jan-12 | 1.5948 | 2.4461 | 2.0340 |
| 19-Jan-12 | 1.5966 | 2.4625 | 2.0521 |
| 20-Jan-12 | 1.5984 | 2.4773 | 2.0745 |
| 23-Jan-12 | 1.6136 | 2.5068 | 2.0797 |
| 24-Jan-12 | 1.6222 | 2.5231 | 2.1112 |
| 25-Jan-12 | 1.6670 | 2.6012 | 2.1722 |
| 26-Jan-12 | 1.6715 | 2.6176 | 2.1915 |
| 27-Jan-12 | 1.6687 | 2.6154 | 2.1871 |
| 30-Jan-12 | 1.6678 | 2.6154 | 2.1942 |
| 31-Jan-12 | 1.6658 | 2.6205 | 2.1935 |
|  |  |  |  |
| 1-Feb-12 | 1.6658 | 2.6203 | 2.1750 |
| 2-Feb-12 | 1.6644 | 2.6367 | 2.1922 |
| 3-Feb-12 | 1.6647 | 2.6348 | 2.1862 |
| 6-Feb-12 | 1.6639 | 2.6241 | 2.1761 |
| 7-Feb-12 | 1.6630 | 2.6279 | 2.1812 |
| 8-Feb-12 | 1.6636 | 2.6462 | 2.2069 |
| 9-Feb-12 | 1.6644 | 2.6361 | 2.2123 |
| 10-Feb-12 | 1.6653 | 2.6295 | 2.2086 |
| 13-Feb-12 | 1.6677 | 2.6341 | 2.2121 |
| 14-Feb-12 | 1.6678 | 2.6219 | 2.1931 |
| 15-Feb-12 | 1.6680 | 2.6243 | 2.1999 |
| 16-Feb-12 | 1.6698 | 2.6177 | 2.1734 |
| 17-Feb-12 | 1.6745 | 2.6467 | 2.1970 |
| 20-Feb-12 | 1.6748 | 2.6543 | 2.2085 |
| 21-Feb-12 | 1.6757 | 2.6578 | 2.2209 |
| 22-Feb-12 | 1.6764 | 2.6471 | 2.2196 |
| 23-Feb-12 | 1.6777 | 2.6325 | 2.2266 |
| 24-Feb-12 | 1.6780 | 2.6423 | 2.2442 |
| 27-Feb-12 | 1.6786 | 2.6627 | 2.2583 |
| 28-Feb-12 | 1.6788 | 2.6602 | 2.2567 |
| 29-Feb-12 | 1.6782 | 2.6733 | 2.2620 |
|  |  |  |  |
| 1-Mar-12 | 1.6784 | 2.6710 | 2.2380 |
| 2-Mar-12 | 1.6784 | 2.6746 | 2.2309 |
| 5-Mar-12 | 1.6801 | 2.6587 | 2.2188 |
| 7-Mar-12 | 1.6809 | 2.6441 | 2.2090 |
| 8-Mar-12 | 1.6817 | 2.6503 | 2.2152 |
| 9-Mar-12 | 1.6828 | 2.6599 | 2.2275 |
| 12-Mar-12 | 1.6840 | 2.6399 | 2.2076 |
| 13-Mar-12 | 1.6956 | 2.6382 | 2.2199 |
| 14-Mar-12 | 1.6873 | 2.6413 | 2.1996 |
| 15-Mar-12 | 1.6907 | 2.6475 | 2.2062 |
| 16-Mar-12 | 1.6926 | 2.6611 | 2.2160 |
| 19-Mar-12 | 1.6957 | 2.6855 | 2.2330 |
| 20-Mar-12 | 1.7031 | 2.7026 | 2.2528 |
| 21-Mar-12 | 1.7077 | 2.7118 | 2.2634 |
| 22-Mar-12 | 1.7118 | 2.7197 | 2.2662 |
| 23-Mar-12 | 1.7184 | 2.7255 | 2.2753 |
| 26-Mar-12 | 1.7175 | 2.7238 | 2.2758 |
| 27-Mar-12 | 1.7204 | 2.7444 | 2.2942 |
| 28-Mar-12 | 1.7293 | 2.7567 | 2.3044 |
| 29-Mar-12 | 1.7295 | 2.7537 | 2.3073 |
| 30-Mar-12 | 1.7307 | 2.7719 | 2.3126 |
|  |  |  |  |
| 2-Apr-12 | 1.7314 | 2.7743 | 2.3110 |
| 3-Apr-12 | 1.7301 | 2.7746 | 2.3089 |
| 4-Apr-12 | 1.7316 | 2.7523 | 2.2857 |
| 5-Apr-12 | 1.7340 | 2.7572 | 2.2803 |
| 10-Apr-12 | 1.7330 | 2.7549 | 2.2726 |
| 11-Apr-12 | 1.7360 | 2.7619 | 2.2767 |
| 12-Apr-12 | 1.7425 | 2.7755 | 2.2887 |
| 13-Apr-12 | 1.7483 | 2.7869 | 2.3026 |
| 13-Apr-12 | 1.8769 | 2.7711 | 2.3123 |
| 16-Apr-12 | 1.7509 | 2.7721 | 2.2800 |
| 17-Apr-12 | 1.7539 | 2.7939 | 2.3051 |
| 18-Apr-12 | 1.7562 | 2.7971 | 2.3041 |
| 19-Apr-12 | 1.7603 | 2.8230 | 2.3097 |
| 20-Apr-12 | 1.7616 | 2.8291 | 2.3161 |
| 23-Apr-12 | 1.7664 | 2.8453 | 2.3268 |
| 24-Apr-12 | 1.7749 | 2.8618 | 2.3352 |
| 25-Apr-12 | 1.7819 | 2.8775 | 2.3537 |
| 26-Apr-12 | 1.7847 | 2.8894 | 2.3621 |
| 27-Apr-12 | 1.7877 | 2.8908 | 2.3540 |
| 30-Apr-12 | 1.7942 | 2.9220 | 2.3794 |
|  |  |  |  |
| 2-May-12 | 1.7935 | 2.9114 | 2.3721 |
| 3-May-12 | 1.7981 | 2.9097 | 2.3658 |
| 4-May-12 | 1.7944 | 2.9019 | 2.2096 |
| 7-May-12 | 1.7965 | 2.9013 | 2.3377 |
| 7-May-12 | 1.9457 | 2.9497 | 2.3773 |
| 8-May-12 | 1.8072 | 2.9470 | 2.3764 |
| 9-May-12 | 1.8117 | 2.9263 | 2.3528 |
| 10-May-12 | 1.8139 | 3.0551 | 2.3514 |
| 11-May-12 | 1.8219 | 2.9288 | 2.3530 |
| 14-May-12 | 1.9543 | 2.9354 | 2.3504 |
| 14-May-12 | 1.8256 | 2.9340 | 2.4138 |
| 15-May-12 | 1.8272 | 2.9427 | 2.3489 |
| 16-May-12 | 1.8329 | 2.9259 | 2.3270 |
| 17-May-12 | 1.8366 | 2.9200 | 2.3366 |
| 18-May-12 | 1.8434 | 2.9061 | 2.3330 |
| 21-May-12 | 1.8453 | 2.9174 | 2.3572 |
| 22-May-12 | 1.8469 | 2.9254 | 2.3637 |
| 23-May-12 | 1.8489 | 2.9135 | 2.3435 |
| 24-May-12 | 1.8494 | 2.9021 | 2.3262 |
| 28-May-12 | 1.8590 | 2.9182 | 2.3431 |
| 29-May-12 | 1.8610 | 2.9234 | 2.3362 |
| 30-May-12 | 1.8618 | 2.9027 | 2.3202 |
| 31-May-12 | 1.8688 | 2.8926 | 2.3154 |
|  |  |  |  |
| 1-Jun-12 | 1.8741 | 2.8831 | 2.3166 |
| 4-Jun-12 | 1.8731 | 2.8792 | 2.3251 |
| 5-Jun-12 | 1.8749 | 2.8814 | 2.3393 |
| 6-Jun-12 | 1.8760 | 2.8983 | 2.3451 |
| 7-Jun-12 | 1.8762 | 2.8989 | 2.3550 |
| 8-Jun-12 | 1.8788 | 2.9027 | 2.3461 |
| 11-Jun-12 | 1.8753 | 2.9119 | 2.3613 |
| 12-Jun-12 | 1.8752 | 2.9090 | 1.2802 |
| 13-Jun-12 | 1.8646 | 2.9232 | 2.3513 |
| 14-Jun-12 | 1.8798 | 2.9134 | 2.3646 |
| 15-Jun-12 | 1.8817 | 2.9182 | 2.3758 |
| 18-Jun-12 | 1.8824 | 2.9534 | 2.3894 |
| 19-Jun-12 | 1.8900 | 2.9640 | 2.3839 |
| 20-Jun-12 | 1.8945 | 2.9795 | 2.4027 |
| 21-Jun-12 | 1.8947 | 2.9708 | 2.4026 |
| 22-Jun-12 | 1.8933 | 2.9566 | 2.3749 |
| 25-Jun-12 | 1.8962 | 2.9534 | 2.3735 |
| 26-Jun-12 | 1.8919 | 2.9503 | 2.3653 |
| 27-Jun-12 | 1.8976 | 2.9638 | 2.3688 |
| 28-Jun-12 | 1.8989 | 2.9647 | 2.3739 |
| 29-Jun-12 | 1.8989 | 2.9746 | 2.3931 |
|  |  |  |  |
| 3-Jul-12 | 1.9014 | 2.9848 | 2.3969 |
| 4-Jul-12 | 1.9026 | 2.9829 | 2.3957 |
| 5-Jul-12 | 1.9063 | 2.9753 | 2.3893 |
| 6-Jul-12 | 1.9066 | 2.9589 | 2.3594 |
| 9-Jul-12 | 1.9072 | 2.9565 | 2.3467 |
| 10-Jul-12 | 1.8730 | 2.9052 | 2.3032 |
| 11-Jul-12 | 1.9089 | 2.9639 | 2.3398 |
| 12-Jul-12 | 1.9543 | 2.9533 | 2.3335 |
| 13-Jul-12 | 1.9127 | 2.9493 | 2.3313 |
| 16-Jul-12 | 1.9126 | 2.9926 | 2.3389 |
| 17-Jul-12 | 1.9159 | 2.9962 | 2.3560 |
| 18-Jul-12 | 1.9182 | 2.9995 | 2.3552 |
| 19-Jul-12 | 1.9190 | 3.0084 | 2.3595 |
| 20-Jul-12 | 1.9201 | 3.0131 | 2.3558 |
| 23-Jul-12 | 1.9209 | 2.9891 | 2.3237 |
| 24-Jul-12 | 1.9209 | 2.9779 | 2.3264 |
| 25-Jul-12 | 1.9212 | 2.9845 | 2.3242 |
| 26-Jul-12 | 1.9226 | 2.9792 | 2.3352 |
| 27-Jul-12 | 1.9235 | 3.0154 | 2.3613 |
| 30-Jul-12 | 1.9229 | 3.0168 | 2.3581 |
| 31-Jul-12 | 1.9246 | 3.0217 | 2.3620 |
|  |  |  |  |
| 1-Aug-12 | 1.9244 | 3.0151 | 2.3704 |
| 2-Aug-12 | 1.9246 | 2.9909 | 2.3578 |
| 3-Aug-12 | 1.9257 | 2.9871 | 2.3490 |
| 6-Aug-12 | 1.9259 | 2.9994 | 2.3782 |
| 7-Aug-12 | 1.9256 | 3.0082 | 2.3927 |
| 8-Aug-12 | 1.9261 | 3.0025 | 2.3838 |
| 9-Aug-12 | 1.9263 | 3.0165 | 2.3801 |
| 13-Aug-12 | 1.9271 | 3.0200 | 2.3671 |
| 14-Aug-12 | 1.9292 | 3.0301 | 2.3880 |
| 15-Aug-12 | 1.9291 | 3.0216 | 2.3779 |
| 16-Aug-12 | 1.9283 | 3.0169 | 2.3656 |
| 17-Aug-12 | 1.9282 | 3.0285 | 2.3803 |
| 21-Aug-12 | 1.9282 | 3.0376 | 2.3889 |
| 22-Aug-12 | 1.9279 | 3.0435 | 2.4017 |
| 23-Aug-12 | 1.9284 | 3.0652 | 2.4221 |
| 24-Aug-12 | 1.9275 | 3.0542 | 2.4169 |
| 27-Aug-12 | 1.9264 | 3.0469 | 2.4117 |
| 28-Aug-12 | 1.9234 | 3.0341 | 2.4094 |
| 29-Aug-12 | 1.9228 | 3.0416 | 2.4124 |
| 30-Aug-12 | 1.9232 | 3.0452 | 2.4149 |
| 31-Aug-12 | 1.9233 | 3.0372 | 2.4079 |
|  |  |  |  |
| 3-Sep-12 | 1.9224 | 3.0496 | 2.4165 |
| 4-Sep-12 | 1.9224 | 3.0572 | 2.4258 |
| 5-Sep-12 | 1.9229 | 3.0480 | 2.4077 |
| 6-Sep-12 | 1.9224 | 3.0581 | 2.4276 |
| 7-Sep-12 | 1.9204 | 3.0668 | 2.4328 |
| 10-Sep-12 | 1.9178 | 3.0679 | 2.4506 |
| 11-Sep-12 | 1.9144 | 3.0664 | 2.4493 |
| 12-Sep-12 | 1.9078 | 3.0738 | 2.4570 |
| 13-Sep-12 | 1.9008 | 3.0721 | 2.4626 |
| 14-Sep-12 | 1.9034 | 3.0822 | 2.4792 |
| 17-Sep-12 | 1.9026 | 3.0861 | 2.4941 |
| 18-Sep-12 | 1.9011 | 3.0860 | 2.4854 |
| 19-Sep-12 | 1.9002 | 3.0856 | 2.4762 |
| 20-Sep-12 | 1.9002 | 3.0753 | 2.4654 |
| 24-Sep-12 | 1.9018 | 3.0875 | 2.4654 |
| 25-Sep-12 | 1.9038 | 3.0926 | 2.4564 |
| 26-Sep-12 | 1.9044 | 3.0784 | 2.4504 |
| 27-Sep-12 | 1.9038 | 3.0834 | 2.4530 |
| 28-Sep-12 | 1.9012 | 3.0898 | 2.4574 |
|  |  |  |  |
| 1-Oct-12 | 1.9005 | 3.0673 | 2.4418 |
| 2-Oct-12 | 1.8994 | 3.0655 | 2.4472 |
| 3-Oct-12 | 1.8992 | 3.0552 | 2.4465 |
| 4-Oct-12 | 1.8991 | 3.0592 | 2.4584 |
| 5-Oct-12 | 1.8991 | 3.0731 | 2.4686 |
| 8-Oct-12 | 1.8986 | 3.0541 | 2.4658 |
| 9-Oct-12 | 1.8977 | 3.0442 | 2.4628 |
| 10-Oct-12 | 1.8959 | 3.0331 | 2.4404 |
| 11-Oct-12 | 1.8940 | 3.0314 | 2.4351 |
| 12-Oct-12 | 1.8939 | 3.0370 | 2.4544 |
| 15-Oct-12 | 1.8939 | 3.0374 | 2.4489 |
| 16-Oct-12 | 1.8940 | 3.0484 | 2.4618 |
| 17-Oct-12 | 1.8932 | 3.0557 | 2.4826 |
| 18-Oct-12 | 1.8932 | 3.0528 | 2.4781 |
| 19-Oct-12 | 1.8939 | 3.0339 | 2.4737 |
| 22-Oct-12 | 1.8892 | 3.0281 | 2.4629 |
| 23-Oct-12 | 1.8888 | 3.0231 | 2.4611 |
| 24-Oct-12 | 1.8859 | 3.0145 | 2.4491 |
| 25-Oct-12 | 1.8848 | 3.0280 | 2.4491 |
| 29-Oct-12 | 1.8838 | 3.0275 | 2.4305 |
| 30-Oct-12 | 1.8821 | 3.0201 | 2.4319 |
| 31-Oct-12 | 1.8801 | 3.0235 | 2.4355 |
|  |  |  |  |
| 1-Nov-12 | 1.8795 | 3.0327 | 2.4331 |
| 2-Nov-12 | 1.8829 | 3.0303 | 2.4303 |
| 5-Nov-12 | 1.8813 | 3.0164 | 2.4230 |
| 6-Nov-12 | 1.8808 | 3.0068 | 2.4042 |
| 7-Nov-12 | 1.8758 | 3.0076 | 2.4134 |
| 8-Nov-12 | 1.8753 | 2.9978 | 2.3926 |
| 9-Nov-12 | 1.8746 | 2.9986 | 2.3936 |
| 12-Nov-12 | 1.8761 | 2.9805 | 2.3843 |
| 13-Nov-12 | 1.8754 | 2.9756 | 2.3783 |
| 14-Nov-12 | 1.8756 | 2.9789 | 2.3846 |
| 15-Nov-12 | 1.8753 | 2.9716 | 2.3884 |
| 16-Nov-12 | 1.8755 | 2.9750 | 2.3927 |
| 19-Nov-12 | 1.8752 | 2.9834 | 2.3940 |
| 20-Nov-12 | 1.8753 | 2.9834 | 2.3997 |
| 21-Nov-12 | 1.8753 | 2.9798 | 2.3904 |
| 22-Nov-12 | 1.8775 | 2.9973 | 2.4133 |
| 23-Nov-12 | 1.8785 | 2.9966 | 2.4219 |
| 26-Nov-12 | 1.8794 | 3.0117 | 2.4366 |
| 27-Nov-12 | 1.8807 | 3.0180 | 2.4432 |
| 28-Nov-12 | 1.8821 | 3.0126 | 2.4317 |
| 29-Nov-12 | 1.8844 | 3.0161 | 2.4399 |
| 30-Nov-12 | 1.8856 | 3.0276 | 2.4554 |
|  |  |  |  |
| 3-Dec-12 | 1.8864 | 3.0254 | 2.4577 |
| 4-Dec-12 | 1.8851 | 3.0354 | 2.4625 |
| 5-Dec-12 | 1.8844 | 3.0360 | 2.4708 |
| 6-Dec-12 | 1.8825 | 3.0282 | 2.4578 |
| 10-Dec-12 | 1.8821 | 3.0160 | 2.4266 |
| 11-Dec-12 | 1.8821 | 3.0262 | 2.4385 |
| 12-Dec-12 | 1.8834 | 3.0340 | 2.4491 |
| 13-Dec-12 | 1.8839 | 3.0410 | 2.4664 |
| 14-Dec-12 | 1.8839 | 3.0390 | 2.4681 |
| 17-Dec-12 | 1.8829 | 3.0479 | 2.4779 |
| 18-Dec-12 | 1.8839 | 3.0537 | 2.4801 |
| 19-Dec-12 | 1.8843 | 3.0650 | 2.4948 |
| 20-Dec-12 | 1.8853 | 3.0640 | 2.4923 |
| 21-Dec-12 | 1.8851 | 3.0638 | 2.4890 |
| 24-Dec-12 | 1.8851 | 3.0487 | 2.4871 |
| 27-Dec-12 | 1.8850 | 3.0421 | 2.4958 |
| 28-Dec-12 | 1.8841 | 3.0377 | 2.4970 |
| 31-Dec-12 | 1.8846 | 3.0410 | 2.4848 |
|  |  |  |  |
|  |  |  |  |
| 2-Jan-13 | 1.8856 | 3.0788 | 2.5056 |
| 3-Jan-13 | 1.8879 | 3.0637 | 2.4810 |
| 4-Jan-13 | 1.8892 | 3.0335 | 2.4592 |
| 7-Jan-13 | 1.8890 | 3.0305 | 2.4639 |
| 8-Jan-13 | 1.8886 | 3.0392 | 2.4771 |
| 9-Jan-13 | 1.8888 | 3.0319 | 2.4712 |
| 10-Jan-13 | 1.8886 | 3.0247 | 2.4659 |
| 11-Jan-13 | 1.8878 | 3.0474 | 2.5025 |
| 14-Jan-13 | 1.8878 | 3.0471 | 2.5262 |
| 15-Jan-13 | 1.8905 | 3.0407 | 2.5245 |
| 16-Jan-13 | 1.9000 | 2.5479 | 2.5222 |
| 17-Jan-13 | 1.9001 | 3.0405 | 2.5272 |
| 18-Jan-13 | 1.9013 | 3.0389 | 2.5449 |
| 21-Jan-13 | 1.9059 | 3.0248 | 2.5392 |
| 22-Jan-13 | 1.9059 | 3.0209 | 2.5475 |
| 23-Jan-13 | 1.9068 | 3.0164 | 2.5361 |
| 24-Jan-13 | 1.9056 | 3.0190 | 2.5416 |
| 25-Jan-13 | 1.9059 | 3.0086 | 2.5562 |
| 28-Jan-13 | 1.9051 | 3.0010 | 2.5619 |
| 29-Jan-13 | 1.9057 | 2.9923 | 2.5607 |
| 30-Jan-13 | 1.8997 | 2.9933 | 2.5668 |
| 31-Jan-13 | 1.9003 | 3.0062 | 2.5756 |
|  |  |  |  |
| 1-Feb-13 | 1.9035 | 3.0202 | 2.5930 |
| 4-Feb-13 | 1.9026 | 2.9895 | 2.5943 |
| 5-Feb-13 | 1.9057 | 2.9977 | 2.5670 |
| 6-Feb-13 | 1.9060 | 2.9803 | 2.5803 |
| 7-Feb-13 | 1.9050 | 2.9840 | 2.5770 |
| 8-Feb-13 | 1.9062 | 2.9975 | 2.5517 |
| 11-Feb-13 | 1.9080 | 3.0113 | 2.5534 |
| 12-Feb-13 | 1.9039 | 2.9796 | 2.5459 |
| 13-Feb-13 | 1.9005 | 2.9751 | 2.5565 |
| 14-Feb-13 | 1.9018 | 2.9494 | 2.5463 |
| 15-Feb-13 | 1.9028 | 2.9541 | 2.5439 |
| 18-Feb-13 | 1.9033 | 2.9445 | 2.5393 |
| 19-Feb-13 | 1.9033 | 2.9475 | 2.5403 |
| 20-Feb-13 | 1.8994 | 2.9326 | 2.5497 |
| 21-Feb-13 | 1.9036 | 2.8916 | 2.5235 |
| 22-Feb-13 | 1.9019 | 2.9057 | 2.5137 |
| 25-Feb-13 | 1.9064 | 2.8869 | 2.5181 |
| 26-Feb-13 | 1.9110 | 2.9004 | 2.4891 |
| 27-Feb-13 | 1.9091 | 2.8832 | 2.4980 |
| 28-Feb-13 | 1.9111 | 2.9001 | 2.5124 |
|  |  |  |  |
| 1-Mar-13 | 1.9143 | 2.9039 | 2.5012 |
| 4-Mar-13 | 1.9091 | 2.8686 | 2.4809 |
| 5-Mar-13 | 1.9210 | 2.9038 | 2.5054 |
| 7-Mar-13 | 1.9168 | 2.8954 | 2.4945 |
| 8-Mar-13 | 1.9150 | 2.8826 | 2.5094 |
| 11-Mar-13 | 1.9118 | 2.8540 | 2.4834 |
| 12-Mar-13 | 1.9148 | 2.8557 | 2.4913 |
| 13-Mar-13 | 1.9191 | 2.8556 | 2.5011 |
| 14-Mar-13 | 1.9251 | 2.8719 | 2.4925 |
| 15-Mar-13 | 1.9266 | 2.9019 | 2.5025 |
| 18-Mar-13 | 1.9327 | 2.9247 | 2.5250 |
| 19-Mar-13 | 1.9271 | 2.9140 | 2.5019 |
| 20-Mar-13 | 1.9282 | 2.9163 | 2.4857 |
| 21-Mar-13 | 1.9286 | 2.9181 | 2.4986 |
| 22-Mar-13 | 1.9331 | 2.9328 | 2.4971 |
| 25-Mar-13 | 1.9296 | 2.9402 | 2.5049 |
| 26-Mar-13 | 1.9323 | 2.9341 | 2.4895 |
| 27-Mar-13 | 1.9345 | 2.9340 | 2.4898 |
| 28-Mar-13 | 1.9385 | 2.9303 | 2.4784 |
|  |  |  |  |
| 2-Apr-13 | 1.9390 | 2.9424 | 2.4882 |
| 3-Apr-13 | 1.9394 | 2.9320 | 2.4897 |
| 4-Apr-13 | 1.9414 | 2.9413 | 2.4931 |
| 5-Apr-13 | 1.9351 | 2.9389 | 2.4868 |
| 8-Apr-13 | 1.9427 | 2.9792 | 2.5305 |
| 9-Apr-13 | 1.9316 | 2.9473 | 2.5124 |
| 10-Apr-13 | 1.9431 | 2.9762 | 2.5430 |
| 11-Apr-13 | 1.9400 | 2.9698 | 2.5330 |
| 12-Apr-13 | 1.9461 | 2.9971 | 2.5541 |
| 15-Apr-13 | 1.9348 | 2.9720 | 2.5330 |
| 16-Apr-13 | 1.9381 | 2.9684 | 2.5351 |
| 17-Apr-13 | 1.9472 | 2.9813 | 2.5576 |
| 18-Apr-13 | 1.9400 | 2.9574 | 2.5286 |
| 19-Apr-13 | 1.9483 | 2.5385 | 2.5484 |
| 22-Apr-13 | 1.9415 | 2.9628 | 2.5398 |
| 23-Apr-13 | 1.9461 | 2.9699 | 2.5396 |
| 24-Apr-13 | 1.9507 | 2.9776 | 2.5384 |
| 25-Apr-13 | 1.9573 | 2.9869 | 2.5438 |
| 26-Apr-13 | 1.9598 | 3.0259 | 2.5485 |
| 29-Apr-13 | 1.9694 | 3.0509 | 2.5652 |
| 30-Apr-13 | 1.9674 | 3.0489 | 2.5766 |
|  |  |  |  |
| 2-May-13 | 1.9548 | 3.0408 | 2.5743 |
| 3-May-13 | 1.9571 | 3.0356 | 2.5554 |
| 6-May-13 | 1.9493 | 3.0347 | 2.5562 |
| 7-May-13 | 1.9143 | 3.0232 | 2.5428 |
| 8-May-13 | 1.9702 | 3.0482 | 2.5783 |
| 9-May-13 | 1.9630 | 3.0673 | 2.5869 |
| 10-May-13 | 1.9784 | 3.0065 | 2.5939 |
| 13-May-13 | 1.9588 | 2.9882 | 2.5410 |
| 14-May-13 | 1.9154 | 2.9798 | 2.5370 |
| 15-May-13 | 1.9395 | 2.9566 | 2.5158 |
| 16-May-13 | 1.9392 | 2.9477 | 2.4923 |
| 17-May-13 | 1.9519 | 2.9864 | 2.5173 |
| 20-May-13 | 1.9634 | 2.9784 | 2.5167 |
| 21-May-13 | 1.9682 | 2.9965 | 2.5327 |
| 22-May-13 | 1.9589 | 2.9706 | 2.5284 |
| 23-May-13 | 1.9680 | 2.9584 | 2.5305 |
| 24-May-13 | 1.9707 | 2.9791 | 2.5515 |
| 28-May-13 | 1.9811 | 2.9979 | 2.5601 |
| 29-May-13 | 1.9647 | 2.9592 | 2.5288 |
| 30-May-13 | 1.9716 | 2.9806 | 2.5518 |
| 31-May-13 | 1.9723 | 2.9982 | 2.5725 |
|  |  |  |  |
| 3-Jun-13 | 1.9880 | 3.0103 | 2.5746 |
| 5-Jun-13 | 1.9754 | 3.0223 | 2.5820 |
| 6-Jun-13 | 1.9757 | 3.0433 | 2.5878 |
| 7-Jun-13 | 1.9822 | 3.0778 | 2.6152 |
| 8-Jun-13 | 1.9500 | 3.1021 | 2.6855 |
| 10-Jun-13 | 1.9831 | 3.0831 | 2.6227 |
| 11-Jun-13 | 1.9777 | 3.0767 | 2.6161 |
| 12-Jun-13 | 1.9858 | 3.0943 | 2.6358 |
| 13-Jun-13 | 1.9795 | 3.1057 | 2.6412 |
| 14-Jun-13 | 1.9858 | 3.1167 | 2.6445 |
| 17-Jun-13 | 1.9893 | 3.1200 | 2.6534 |
| 18-Jun-13 | 1.9815 | 3.1103 | 2.6423 |
| 19-Jun-13 | 2.0021 | 3.1288 | 2.6836 |
| 20-Jun-13 | 1.9817 | 3.1035 | 2.6564 |
| 21-Jun-13 | 1.9938 | 3.0858 | 2.6372 |
| 24-Jun-13 | 1.9820 | 3.0581 | 2.6043 |
| 25-Jun-13 | 2.0031 | 3.0869 | 2.6234 |
| 26-Jun-13 | 1.9881 | 3.0645 | 2.6019 |
| 27-Jun-13 | 1.9885 | 3.0485 | 2.5853 |
| 28-Jun-13 | 1.9883 | 3.0288 | 2.5879 |
|  |  |  |  |
| 2-Jul-13 | 1.9889 | 3.0263 | 2.5880 |
| 3-Jul-13 | 1.9889 | 3.0161 | 2.5891 |
| 4-Jul-13 | 2.0046 | 3.0624 | 2.6091 |
| 5-Jul-13 | 2.0046 | 3.0624 | 2.6091 |
| 8-Jul-13 | 1.9893 | 2.9662 | 2.5527 |
| 9-Jul-13 | 1.9891 | 2.9742 | 2.5600 |
| 10-Jul-13 | 1.9898 | 2.9545 | 2.5431 |
| 11-Jul-13 | 1.9860 | 2.9660 | 2.5527 |
| 12-Jul-13 | 1.9900 | 3.0099 | 2.5963 |
| 15-Jul-13 | 1.9906 | 3.0100 | 2.5986 |
| 16-Jul-13 | 1.9909 | 3.0036 | 2.5958 |
| 17-Jul-13 | 1.9903 | 3.0092 | 2.6160 |
| 18-Jul-13 | 1.9909 | 3.0227 | 2.6073 |
| 19-Jul-13 | 1.9913 | 3.0263 | 2.6058 |
| 19-Jul-13 | 1.9490 | 3.3276 | 2.6601 |
| 22-Jul-13 | 1.9907 | 3.0358 | 2.6150 |
| 23-Jul-13 | 1.9908 | 3.0580 | 2.6264 |
| 24-Jul-13 | 1.9908 | 3.0600 | 2.6308 |
| 25-Jul-13 | 1.9914 | 3.0596 | 2.6344 |
| 26-Jul-13 | 1.9888 | 3.0499 | 2.6316 |
| 29-Jul-13 | 1.9908 | 3.0590 | 2.6410 |
| 30-Jul-13 | 1.9908 | 3.0566 | 2.6410 |
| 31-Jul-13 | 1.9925 | 3.0380 | 2.6435 |
|  |  |  |  |
| 1-Aug-13 | 1.9908 | 3.0213 | 2.6436 |
| 2-Aug-13 | 1.9919 | 3.0113 | 2.6308 |
| 5-Aug-13 | 2.0128 | 3.0746 | 2.6702 |
| 6-Aug-13 | 1.9922 | 3.0569 | 2.6408 |
| 7-Aug-13 | 2.0182 | 3.1021 | 2.6855 |
| 9-Aug-13 | 1.9929 | 3.0913 | 2.6557 |
| 12-Aug-13 | 1.9930 | 3.0910 | 2.6593 |
| 13-Aug-13 | 1.9930 | 3.0849 | 2.6528 |
| 14-Aug-13 | 1.9940 | 3.0823 | 2.6400 |
| 15-Aug-13 | 1.9941 | 3.0971 | 2.6435 |
| 16-Aug-13 | 1.9941 | 3.1027 | 2.6427 |
| 19-Aug-13 | 1.9942 | 3.1130 | 2.6576 |
| 20-Aug-13 | 1.9947 | 3.1244 | 2.6623 |
| 21-Aug-13 | 1.9948 | 3.1282 | 2.6787 |
| 22-Aug-13 | 1.9951 | 3.1309 | 2.6685 |
| 23-Aug-13 | 1.9953 | 3.1095 | 2.6658 |
| 26-Aug-13 | 1.9953 | 3.1103 | 2.6738 |
| 27-Aug-13 | 1.9956 | 3.1062 | 2.6677 |
| 28-Aug-13 | 1.9963 | 3.1029 | 2.6677 |
| 29-Aug-13 | 1.9958 | 3.0980 | 2.6677 |
| 30-Aug-13 | 1.9965 | 3.0941 | 2.6400 |
|  |  |  |  |
| 2-Sep-13 | 1.9960 | 3.0884 | 2.6436 |
| 3-Sep-13 | 1.9960 | 3.1031 | 2.6308 |
| 4-Sep-13 | 1.9963 | 3.1006 | 2.6702 |
| 5-Sep-13 | 1.9969 | 3.1233 | 2.6408 |
| 6-Sep-13 | 1.9963 | 3.1130 | 2.6855 |
| 9-Sep-13 | 1.9982 | 3.1217 | 2.6557 |
| 10-Sep-13 | 1.9972 | 3.1388 | 2.6593 |
| 11-Sep-13 | 1.9975 | 3.1406 | 2.6528 |
| 12-Sep-13 | 1.9976 | 3.1588 | 2.6400 |
| 13-Sep-13 | 1.9976 | 3.1600 | 2.6435 |
| 16-Sep-13 | 1.9982 | 3.1680 | 2.6427 |
| 17-Sep-13 | 1.9982 | 3.1837 | 2.6576 |
| 18-Sep-13 | 1.9982 | 3.1765 | 2.6623 |
| 19-Sep-13 | 1.9992 | 3.1911 | 2.6787 |
| 20-Sep-13 | 1.9986 | 3.2070 | 2.6685 |
| 24-Sep-13 | 1.9986 | 3.2010 | 2.6658 |
| 25-Sep-13 | 1.9986 | 3.1994 | 2.6738 |
| 26-Sep-13 | 1.9988 | 3.2115 | 2.6677 |
| 27-Sep-13 | 1.9988 | 3.2010 | 2.6608 |
| 30-Sep-13 | 1.9988 | 3.2244 | 2.6400 |
|  |  |  |  |
| 1-Oct-13 | 1.9988 | 3.2344 | 2.7054 |
| 2-Oct-13 | 1.9988 | 3.2410 | 2.7056 |
| 3-Oct-13 | 1.9990 | 3.2449 | 2.7184 |
| 4-Oct-13 | 1.9990 | 3.2311 | 2.7242 |
| 7-Oct-13 | 1.9990 | 3.2795 | 2.7740 |
| 8-Oct-13 | 1.9990 | 3.2173 | 2.7137 |
| 9-Oct-13 | 1.9990 | 3.2129 | 2.7136 |
| 10-Oct-13 | 1.9991 | 3.1862 | 2.7012 |
| 11-Oct-13 | 1.9991 | 3.1931 | 2.7067 |
| 14-Oct-13 | 1.9990 | 3.1877 | 2.7107 |
| 16-Oct-13 | 1.9991 | 3.1960 | 2.7131 |
| 17-Oct-13 | 1.9992 | 3.1786 | 2.6952 |
| 18-Oct-13 | 1.9997 | 3.2323 | 2.7312 |
| 21-Oct-13 | 2.0000 | 3.2374 | 2.7391 |
| 22-Oct-13 | 2.0019 | 3.2330 | 2.7370 |
| 23-Oct-13 | 2.0064 | 3.2545 | 2.7644 |
| 24-Oct-13 | 2.0071 | 3.2461 | 2.7657 |
| 25-Oct-13 | 2.0127 | 3.2619 | 2.7797 |
| 28-Oct-13 | 2.0133 | 3.2545 | 2.7773 |
| 29-Oct-13 | 2.0157 | 3.2536 | 2.7773 |
| 30-Oct-13 | 2.0209 | 3.2443 | 2.7816 |
| 31-Oct-13 | 2.0256 | 3.2564 | 2.7896 |
|  |  |  |  |
| 1-Nov-13 | 2.0321 | 3.2579 | 2.7628 |
| 4-Nov-13 | 2.0376 | 3.2432 | 2.7478 |
| 5-Nov-13 | 2.0406 | 3.2561 | 2.7580 |
| 6-Nov-13 | 2.0489 | 3.2745 | 2.7613 |
| 7-Nov-13 | 2.0453 | 3.2888 | 2.7676 |
| 8-Nov-13 | 2.0531 | 3.2912 | 2.7450 |
| 11-Nov-13 | 2.0529 | 3.2859 | 2.7438 |
| 12-Nov-13 | 2.0543 | 3.2826 | 2.7541 |
| 13-Nov-13 | 2.0568 | 3.2866 | 2.7574 |
| 14-Nov-13 | 2.0571 | 3.2908 | 2.7613 |
| 15-Nov-13 | 2.0625 | 3.3170 | 2.7748 |
| 18-Nov-13 | 2.0646 | 3.3241 | 2.7827 |
| 19-Nov-13 | 2.0660 | 3.3241 | 2.7937 |
| 20-Nov-13 | 2.0683 | 3.3321 | 2.7969 |
| 21-Nov-13 | 2.0708 | 3.3448 | 2.7879 |
| 22-Nov-13 | 2.0721 | 3.3434 | 2.7911 |
| 25-Nov-13 | 2.0750 | 3.3634 | 2.8121 |
| 26-Nov-13 | 2.0778 | 3.3545 | 2.8046 |
| 27-Nov-13 | 2.0802 | 3.3640 | 2.8046 |
| 28-Nov-13 | 2.0818 | 3.3889 | 2.8262 |
| 29-Nov-13 | 2.0818 | 3.4025 | 2.8306 |
|  |  |  |  |
| 2-Dec-13 | 2.0915 | 3.4157 | 2.8457 |
| 3-Dec-13 | 2.0912 | 3.4227 | 2.8329 |
| 4-Dec-13 | 2.0912 | 3.4329 | 2.8433 |
| 5-Dec-13 | 2.0913 | 3.4198 | 2.8357 |
| 9-Dec-13 | 2.0908 | 3.4099 | 2.8547 |
| 10-Dec-13 | 2.0903 | 3.4241 | 2.8667 |
| 11-Dec-13 | 2.0901 | 3.4337 | 2.8804 |
| 12-Dec-13 | 2.0901 | 3.4202 | 2.8823 |
| 13-Dec-13 | 2.0906 | 3.4155 | 2.8753 |
| 16-Dec-13 | 2.0906 | 3.4037 | 2.8692 |
| 17-Dec-13 | 2.0898 | 3.4080 | 2.8752 |
| 18-Dec-13 | 2.0903 | 3.3946 | 2.8695 |
| 19-Dec-13 | 2.1001 | 3.4423 | 2.8897 |
| 20-Dec-13 | 2.1086 | 3.4541 | 2.8810 |
| 23-Dec-13 | 2.1351 | 3.4933 | 2.9213 |
| 24-Dec-13 | 2.1587 | 3.5305 | 2.9581 |
| 27-Dec-13 | 2.1587 | 3.5348 | 2.9497 |
| 30-Dec-13 | 2.1582 | 3.5593 | 2.9724 |
| 31-Dec-13 | 2.1616 | 3.5726 | 2.9862 |
|  |  |  |  |
|  |  |  |  |
| 2-Jan-14 | 2.2101 | 3.6565 | 3.0465 |
| 3-Jan-14 | 2.2101 | 3.6318 | 3.0141 |
| 6-Jan-14 | 2.2382 | 3.6749 | 3.0463 |
| 7-Jan-14 | 2.2433 | 3.6824 | 3.0607 |
| 8-Jan-14 | 2.2498 | 3.6896 | 3.0618 |
| 9-Jan-14 | 2.2498 | 3.7047 | 3.0616 |
| 10-Jan-14 | 2.2653 | 3.7297 | 3.0780 |
| 13-Jan-14 | 2.2652 | 3.7383 | 3.0976 |
| 14-Jan-14 | 2.2688 | 3.7170 | 3.0974 |
| 15-Jan-14 | 2.2901 | 3.7685 | 3.1342 |
| 16-Jan-14 | 2.2946 | 3.7525 | 3.1197 |
| 17-Jan-14 | 2.2951 | 3.7505 | 3.1229 |
| 20-Jan-14 | 2.2961 | 3.7744 | 3.1168 |
| 21-Jan-14 | 2.2961 | 3.7707 | 3.1144 |
| 22-Jan-14 | 2.3001 | 3.7860 | 3.1135 |
| 23-Jan-14 | 2.3151 | 3.8372 | 3.1397 |
| 24-Jan-14 | 2.3176 | 3.8513 | 3.1708 |
| 27-Jan-14 | 2.3240 | 3.8338 | 3.1781 |
| 28-Jan-14 | 2.3240 | 3.8501 | 3.1759 |
| 29-Jan-14 | 2.3240 | 3.8556 | 3.1739 |
| 30-Jan-14 | 2.3840 | 3.9510 | 3.2574 |
| 31-Jan-14 | 2.3975 | 3.9523 | 3.2482 |
|  |  |  |  |
| 3-Feb-14 | 2.3975 | 3.9435 | 3.2351 |
| 4-Feb-14 | 2.4031 | 3.9222 | 3.2519 |
| 5-Feb-14 | 2.4031 | 3.9176 | 3.2455 |
| 6-Feb-14 | 2.4050 | 3.9207 | 3.2550 |
| 7-Feb-14 | 2.4066 | 3.9323 | 3.2735 |
| 10-Feb-14 | 2.4145 | 3.9597 | 3.2956 |
| 11-Feb-14 | 2.4190 | 3.9649 | 3.2969 |
| 12-Feb-14 | 2.4243 | 3.9901 | 3.3115 |
| 13-Feb-14 | 2.4346 | 4.0323 | 3.3078 |
| 14-Feb-14 | 2.4347 | 4.0131 | 3.2981 |
| 17-Feb-14 | 2.4336 | 4.0740 | 3.3317 |
| 18-Feb-14 | 2.4336 | 4.0647 | 3.3361 |
| 19-Feb-14 | 2.4399 | 4.0768 | 3.3559 |
| 20-Feb-14 | 2.4434 | 4.0833 | 3.3616 |
| 21-Feb-14 | 2.4564 | 4.0924 | 3.3682 |
| 24-Feb-14 | 2.5038 | 4.1828 | 3.4418 |
| 25-Feb-14 | 2.5038 | 4.1627 | 3.4361 |
| 26-Feb-14 | 2.5061 | 4.1840 | 3.4451 |
| 27-Feb-14 | 2.5177 | 4.1889 | 3.4399 |
| 28-Feb-14 | 2.5232 | 4.2087 | 3.4600 |
|  |  |  |  |
| 3-Mar-14 | 2.5255 | 4.2268 | 3.4861 |
| 4-Mar-14 | 2.5267 | 4.2218 | 3.4787 |
| 5-Mar-14 | 2.5283 | 4.2151 | 3.4742 |
| 7-Mar-14 | 2.5300 | 4.2336 | 3.4743 |
| 10-Mar-14 | 2.5371 | 4.2439 | 3.5187 |
| 11-Mar-14 | 2.5417 | 4.2288 | 3.5273 |
| 12-Mar-14 | 2.5455 | 4.2338 | 3.5301 |
| 13-Mar-14 | 2.5483 | 4.2323 | 3.5430 |
| 14-Mar-14 | 2.5520 | 4.2563 | 3.5555 |
| 17-Mar-14 | 2.5617 | 4.2594 | 3.5671 |
| 18-Mar-14 | 2.5685 | 4.2754 | 3.5779 |
| 19-Mar-14 | 2.5709 | 4.2694 | 3.5752 |
| 20-Mar-14 | 2.5832 | 4.2961 | 3.5942 |
| 21-Mar-14 | 2.6193 | 4.3237 | 3.6096 |
| 24-Mar-14 | 2.6251 | 4.3293 | 3.6204 |
| 25-Mar-14 | 2.6425 | 4.3576 | 3.6426 |
| 26-Mar-14 | 2.6459 | 4.3691 | 3.6458 |
| 27-Mar-14 | 2.6513 | 4.3921 | 3.6552 |
| 28-Mar-14 | 2.6725 | 4.4401 | 3.6726 |
| 31-Mar-14 | 2.6800 | 4.4583 | 3.6855 |
|  |  |  |  |
| 1-Apr-14 | 2.6863 | 4.4785 | 3.7012 |
| 2-Apr-14 | 2.6872 | 4.4726 | 3.7099 |
| 3-Apr-14 | 2.6996 | 4.4907 | 3.7151 |
| 4-Apr-14 | 2.6968 | 4.4716 | 3.6966 |
| 7-Apr-14 | 2.6942 | 4.4702 | 3.6914 |
| 8-Apr-14 | 2.6977 | 4.4828 | 3.7078 |
| 9-Apr-14 | 2.7100 | 4.5371 | 3.7398 |
| 10-Apr-14 | 2.7130 | 4.5443 | 3.7471 |
| 11-Apr-14 | 2.7482 | 4.6119 | 3.8181 |
| 14-Apr-14 | 2.7455 | 4.5939 | 3.8159 |
| 15-Apr-14 | 2.7461 | 4.5960 | 3.7940 |
| 16-Apr-14 | 2.7478 | 4.5938 | 3.7943 |
| 17-Apr-14 | 2.7583 | 4.6337 | 3.8089 |
| 22-Apr-14 | 2.7687 | 4.6545 | 3.8307 |
| 23-Apr-14 | 2.7742 | 4.6665 | 3.8270 |
| 24-Apr-14 | 2.7775 | 4.6575 | 3.8389 |
| 25-Apr-14 | 2.7819 | 4.6740 | 3.8450 |
| 28-Apr-14 | 2.7835 | 4.6795 | 3.8514 |
| 29-Apr-14 | 2.7870 | 4.6843 | 3.8579 |
| 30-Apr-14 | 2.7939 | 4.7062 | 3.8604 |
|  |  |  |  |
| 2-May-14 | 2.7950 | 4.7204 | 3.8766 |
| 5-May-14 | 2.7950 | 4.7155 | 3.8755 |
| 6-May-14 | 2.8118 | 4.7427 | 3.9022 |
| 7-May-14 | 2.8142 | 4.7790 | 3.9201 |
| 8-May-14 | 2.8340 | 4.8086 | 3.9454 |
| 9-May-14 | 2.8495 | 4.8322 | 3.9508 |
| 12-May-14 | 2.8500 | 4.8021 | 3.9223 |
| 13-May-14 | 2.8514 | 4.8142 | 3.9242 |
| 14-May-14 | 2.8681 | 4.8282 | 3.9306 |
| 15-May-14 | 2.8777 | 4.8282 | 3.9459 |
| 16-May-14 | 2.8792 | 4.8361 | 3.9523 |
| 19-May-14 | 2.8800 | 4.8465 | 3.9523 |
| 20-May-14 | 2.8808 | 4.8473 | 3.9511 |
| 21-May-14 | 2.8823 | 4.8548 | 3.9465 |
| 22-May-14 | 2.8829 | 4.8646 | 3.9390 |
| 23-May-14 | 2.8849 | 4.8641 | 3.9395 |
| 27-May-14 | 2.8865 | 4.8655 | 3.9408 |
| 28-May-14 | 2.8875 | 4.8672 | 3.9422 |
| 29-May-14 | 2.8907 | 4.8284 | 3.9306 |
| 30-May-14 | 2.8920 | 4.8375 | 3.9393 |
|  |  |  |  |
| 2-Jun-14 | 2.8935 | 4.8543 | 3.9492 |
| 3-Jun-14 | 2.8943 | 4.8488 | 3.9422 |
| 4-Jun-14 | 2.9197 | 4.8873 | 3.9773 |
| 5-Jun-14 | 2.9306 | 4.9092 | 3.9908 |
| 6-Jun-14 | 2.9500 | 4.9531 | 4.0166 |
| 9-Jun-14 | 2.9660 | 4.9807 | 4.0443 |
| 10-Jun-14 | 2.9680 | 4.9847 | 4.0353 |
| 11-Jun-14 | 2.9811 | 4.9968 | 4.0394 |
| 12-Jun-14 | 2.9858 | 5.0124 | 4.0393 |
| 13-Jun-14 | 2.9899 | 5.0359 | 4.0514 |
| 16-Jun-14 | 2.9950 | 5.0827 | 4.0533 |
| 17-Jun-14 | 3.0097 | 5.1117 | 4.0838 |
| 18-Jun-14 | 3.0102 | 5.1053 | 4.0758 |
| 19-Jun-14 | 3.0107 | 5.1012 | 4.0856 |
| 20-Jun-14 | 3.0698 | 5.2331 | 4.1805 |
| 23-Jun-14 | 3.0353 | 5.1646 | 4.1211 |
| 24-Jun-14 | 3.0045 | 5.1101 | 4.0837 |
| 25-Jun-14 | 3.0037 | 5.0968 | 4.0838 |
| 26-Jun-14 | 3.0014 | 5.0965 | 4.0921 |
| 27-Jun-14 | 3.0015 | 5.1042 | 4.0788 |
| 30-Jun-14 | 3.0016 | 5.1080 | 4.0934 |
|  |  |  |  |
| 2-Jul-14 | 3.0022 | 5.1260 | 4.1036 |
| 3-Jul-14 | 3.0092 | 5.1662 | 4.1092 |
| 4-Jul-14 | 3.0105 | 5.1621 | 4.0976 |
| 7-Jul-14 | 3.0105 | 5.1630 | 4.0921 |
| 8-Jul-14 | 3.0121 | 5.1564 | 4.0956 |
| 9-Jul-14 | 3.0225 | 5.1737 | 4.1141 |
| 10-Jul-14 | 3.0226 | 5.1796 | 4.1215 |
| 11-Jul-14 | 3.0231 | 5.1745 | 4.1107 |
| 14-Jul-14 | 3.0231 | 5.1706 | 4.1102 |
| 15-Jul-14 | 3.0231 | 5.1659 | 4.1192 |
| 16-Jul-14 | 3.0331 | 5.2004 | 4.1146 |
| 17-Jul-14 | 3.0331 | 5.1985 | 4.1056 |
| 18-Jul-14 | 3.0331 | 5.1859 | 4.1018 |
| 21-Jul-14 | 3.0331 | 5.1760 | 4.0966 |
| 22-Jul-14 | 3.0331 | 5.1755 | 4.1006 |
| 23-Jul-14 | 3.0331 | 5.1740 | 4.0847 |
| 24-Jul-14 | 3.0337 | 5.1716 | 4.0859 |
| 25-Jul-14 | 3.0337 | 5.1490 | 4.0849 |
| 29-Jul-14 | 3.0337 | 5.1496 | 4.0763 |
| 30-Jul-14 | 3.0337 | 5.1390 | 4.0686 |
| 31-Jul-14 | 3.0337 | 5.1297 | 4.0583 |
|  |  |  |  |
| 1-Aug-14 | 3.0337 | 5.1215 | 4.0605 |
| 4-Aug-14 | 3.0337 | 5.1100 | 4.0763 |
| 5-Aug-14 | 3.0337 | 5.1089 | 4.0712 |
| 6-Aug-14 | 3.0337 | 5.1159 | 4.0546 |
| 7-Aug-14 | 3.0337 | 5.1068 | 4.0511 |
| 8-Aug-14 | 3.0337 | 5.1096 | 4.0507 |
| 11-Aug-14 | 3.0331 | 5.0957 | 4.0712 |
| 12-Aug-14 | 3.0337 | 5.0927 | 4.0605 |
| 13-Aug-14 | 3.0337 | 5.0981 | 4.0520 |
| 14-Aug-14 | 3.0337 | 5.0642 | 4.0596 |
| 15-Aug-14 | 3.0337 | 5.0631 | 4.0596 |
| 18-Aug-14 | 3.0337 | 5.0645 | 4.0651 |
| 19-Aug-14 | 3.0337 | 5.0728 | 4.0545 |
| 20-Aug-14 | 3.0337 | 5.0410 | 4.0402 |
| 21-Aug-14 | 3.0600 | 5.0929 | 4.0665 |
| 22-Aug-14 | 3.0600 | 5.0793 | 4.0659 |
| 25-Aug-14 | 3.1333 | 5.1910 | 4.1461 |
| 26-Aug-14 | 3.1333 | 5.1963 | 4.1360 |
| 27-Aug-14 | 3.1333 | 5.1922 | 4.1349 |
| 28-Aug-14 | 3.1333 | 5.1957 | 4.1336 |
| 29-Aug-14 | 3.1333 | 5.1949 | 4.1278 |
|  |  |  |  |
| 1-Sep-14 | 3.1333 | 5.1989 | 4.1239 |
| 2-Sep-14 | 3.1333 | 5.2062 | 4.1157 |
| 3-Sep-14 | 3.1750 | 5.2404 | 4.1658 |
| 4-Sep-14 | 3.1750 | 5.2240 | 4.1706 |
| 5-Sep-14 | 3.1892 | 5.2289 | 4.1368 |
| 8-Sep-14 | 3.1892 | 5.2042 | 4.1331 |
| 9-Sep-14 | 3.1892 | 5.1549 | 4.1299 |
| 10-Sep-14 | 3.1962 | 5.1481 | 4.1299 |
| 11-Sep-14 | 3.1962 | 5.1597 | 4.1269 |
| 12-Sep-14 | 3.1962 | 5.1857 | 4.1340 |
| 15-Sep-14 | 3.1962 | 5.1878 | 4.1357 |
| 16-Sep-14 | 3.1962 | 5.1891 | 4.1362 |
| 17-Sep-14 | 3.1962 | 5.1822 | 4.1365 |
| 18-Sep-14 | 3.2000 | 5.2247 | 4.1467 |
| 19-Sep-14 | 3.2000 | 5.2445 | 4.1334 |
| 23-Sep-14 | 3.2000 | 5.2234 | 4.1085 |
| 24-Sep-14 | 3.2000 | 5.2347 | 4.1145 |
| 25-Sep-14 | 3.2000 | 5.2324 | 4.0966 |
| 26-Sep-14 | 3.2000 | 5.2155 | 4.0735 |
| 29-Sep-14 | 3.1973 | 5.1935 | 4.0603 |
| 30-Sep-14 | 3.1973 | 5.1942 | 4.0566 |
|  |  |  |  |
| 1-Oct-14 | 3.1970 | 5.1843 | 4.0371 |
| 2-Oct-14 | 3.1975 | 5.1800 | 4.0278 |
| 3-Oct-14 | 3.1975 | 5.1534 | 4.0454 |
| 7-Oct-14 | 3.1975 | 5.1034 | 3.9992 |
| 8-Oct-14 | 3.1975 | 5.1410 | 4.0358 |
| 9-Oct-14 | 3.1975 | 5.1359 | 4.0536 |
| 10-Oct-14 | 3.1973 | 5.1614 | 4.0585 |
| 13-Oct-14 | 3.1971 | 5.1251 | 4.0371 |
| 14-Oct-14 | 3.1971 | 5.1330 | 4.0540 |
| 15-Oct-14 | 3.1971 | 5.0893 | 4.0486 |
| 16-Oct-14 | 3.1970 | 5.0959 | 4.0790 |
| 17-Oct-14 | 3.1970 | 5.1229 | 4.0875 |
| 20-Oct-14 | 3.1957 | 5.1432 | 4.0800 |
| 21-Oct-14 | 3.1957 | 5.1545 | 4.0831 |
| 22-Oct-14 | 3.1957 | 5.1566 | 4.0688 |
| 23-Oct-14 | 3.1957 | 5.1368 | 4.0473 |
| 24-Oct-14 | 3.1950 | 5.1189 | 4.0397 |
| 27-Oct-14 | 3.1950 | 5.1397 | 4.0484 |
| 28-Oct-14 | 3.1950 | 5.1571 | 4.0636 |
| 29-Oct-14 | 3.1950 | 5.1639 | 4.0714 |
| 30-Oct-14 | 3.1955 | 5.1600 | 4.0779 |
| 31-Oct-14 | 3.1955 | 5.1175 | 4.0303 |
|  |  |  |  |
| 3-Nov-14 | 3.1960 | 5.1044 | 3.9966 |
| 4-Nov-14 | 3.1960 | 5.1059 | 3.9898 |
| 5-Nov-14 | 3.1960 | 5.1160 | 4.0016 |
| 6-Nov-14 | 3.1958 | 5.1012 | 3.9893 |
| 7-Nov-14 | 3.1958 | 5.0886 | 3.9746 |
| 10-Nov-14 | 3.1958 | 5.0775 | 3.9719 |
| 11-Nov-14 | 3.1988 | 5.0628 | 3.9778 |
| 12-Nov-14 | 3.1988 | 5.0748 | 3.9724 |
| 13-Nov-14 | 3.1988 | 5.0581 | 3.9878 |
| 14-Nov-14 | 3.1988 | 5.0377 | 3.9897 |
| 17-Nov-14 | 3.1985 | 4.9927 | 3.9734 |
| 18-Nov-14 | 3.1985 | 5.0019 | 3.9851 |
| 19-Nov-14 | 3.1980 | 5.0013 | 4.0042 |
| 20-Nov-14 | 3.1980 | 5.0080 | 4.0088 |
| 21-Nov-14 | 3.1975 | 5.0292 | 4.0132 |
| 24-Nov-14 | 3.1975 | 5.0053 | 3.9733 |
| 25-Nov-14 | 3.1955 | 5.0134 | 3.9699 |
| 26-Nov-14 | 3.1955 | 5.0174 | 3.9829 |
| 27-Nov-14 | 3.1955 | 5.0472 | 3.9989 |
| 28-Nov-14 | 3.1955 | 5.0364 | 3.9933 |
|  |  |  |  |
| 1-Dec-14 | 3.1957 | 5.0092 | 3.9852 |
| 2-Dec-14 | 3.1957 | 5.0341 | 3.9928 |
| 3-Dec-14 | 3.1962 | 5.0015 | 3.9652 |
| 4-Dec-14 | 3.1962 | 5.0125 | 3.9337 |
| 8-Dec-14 | 3.1962 | 5.0093 | 3.9620 |
| 9-Dec-14 | 3.1967 | 4.9949 | 3.9273 |
| 10-Dec-14 | 3.1967 | 5.0123 | 3.9702 |
| 11-Dec-14 | 3.1960 | 5.0165 | 3.9699 |
| 12-Dec-14 | 3.1970 | 5.0122 | 3.9599 |
| 15-Dec-14 | 3.1970 | 5.0277 | 3.9809 |
| 16-Dec-14 | 3.1970 | 5.0053 | 3.9775 |
| 17-Dec-14 | 3.1975 | 5.0378 | 4.0056 |
| 18-Dec-14 | 3.1980 | 5.0158 | 3.9715 |
| 19-Dec-14 | 3.1980 | 5.0077 | 3.9282 |
| 22-Dec-14 | 3.1988 | 5.0067 | 3.9319 |
| 23-Dec-14 | 3.1988 | 4.9957 | 3.9219 |
| 24-Dec-14 | 3.1988 | 4.9558 | 3.8926 |
| 29-Dec-14 | 3.1988 | 4.9720 | 3.8996 |
| 30-Dec-14 | 3.2001 | 4.9691 | 3.9010 |
| 31-Dec-14 | 3.2001 | 4.9791 | 3.8959 |
|  |  |  |  |
|  |  |  |  |
| 2-Jan-15 | 3.2001 | 4.9892 | 3.8813 |
| 5-Jan-15 | 3.2013 | 4.9278 | 3.8467 |
| 6-Jan-15 | 3.2041 | 4.8807 | 3.8217 |
| 7-Jan-15 | 3.2077 | 4.8722 | 3.8260 |
| 8-Jan-15 | 3.2092 | 4.8448 | 3.7946 |
| 9-Jan-15 | 3.2108 | 5.0106 | 3.8130 |
| 12-Jan-15 | 3.2109 | 4.8541 | 3.7850 |
| 13-Jan-15 | 3.2109 | 4.8678 | 3.8001 |
| 14-Jan-15 | 3.2182 | 4.8766 | 3.7842 |
| 15-Jan-15 | 3.2182 | 4.8969 | 3.7924 |
| 16-Jan-15 | 3.2195 | 4.8911 | 3.7465 |
| 19-Jan-15 | 3.2204 | 4.8785 | 3.7183 |
| 20-Jan-15 | 3.2204 | 4.8833 | 3.7424 |
| 21-Jan-15 | 3.2250 | 4.8969 | 3.7366 |
| 22-Jan-15 | 3.2248 | 4.8754 | 3.7551 |
| 23-Jan-15 | 3.2275 | 4.8829 | 3.6983 |
| 26-Jan-15 | 3.2300 | 4.8503 | 3.6392 |
| 27-Jan-15 | 3.2267 | 4.8567 | 3.6359 |
| 28-Jan-15 | 3.2328 | 4.9100 | 3.6787 |
| 29-Jan-15 | 3.2328 | 4.9069 | 3.6611 |
| 30-Jan-15 | 3.2401 | 4.8986 | 3.6705 |
|  |  |  |  |
| 2-Feb-15 | 3.2436 | 4.8766 | 3.6683 |
| 3-Feb-15 | 3.2513 | 4.8929 | 3.6877 |
| 4-Feb-15 | 3.2690 | 4.9355 | 3.7395 |
| 5-Feb-15 | 3.2760 | 4.9856 | 3.7387 |
| 6-Feb-15 | 3.2816 | 5.0192 | 3.7515 |
| 9-Feb-15 | 3.2841 | 5.0192 | 3.7190 |
| 10-Feb-15 | 3.3448 | 5.0908 | 3.7888 |
| 11-Feb-15 | 3.3533 | 5.1099 | 3.7948 |
| 12-Feb-15 | 3.3476 | 5.1068 | 3.7821 |
| 13-Feb-15 | 3.3665 | 5.1703 | 3.8307 |
| 16-Feb-15 | 3.3890 | 5.2199 | 3.8666 |
| 17-Feb-15 | 3.3890 | 5.2123 | 3.8660 |
| 18-Feb-15 | 3.3957 | 5.2092 | 3.8717 |
| 19-Feb-15 | 3.4020 | 5.2474 | 3.8641 |
| 20-Feb-15 | 3.4038 | 5.2519 | 3.8735 |
| 23-Feb-15 | 3.4147 | 5.2472 | 3.8688 |
| 24-Feb-15 | 3.4404 | 5.3096 | 3.9000 |
| 25-Feb-15 | 3.4553 | 5.3267 | 3.9082 |
| 26-Feb-15 | 3.4631 | 5.3654 | 3.9316 |
| 27-Feb-15 | 3.4745 | 5.3560 | 3.9001 |
|  |  |  |  |
| 2-Mar-15 | 3.4736 | 5.3549 | 3.8889 |
| 3-Mar-15 | 3.4740 | 5.3371 | 3.8910 |
| 4-Mar-15 | 3.4827 | 5.3585 | 3.8980 |
| 5-Mar-15 | 3.4912 | 5.3290 | 3.8626 |
| 9-Mar-15 | 3.5095 | 5.3467 | 3.8756 |
| 10-Mar-15 | 3.5078 | 5.3000 | 3.8089 |
| 11-Mar-15 | 3.5272 | 5.3201 | 3.7932 |
| 12-Mar-15 | 3.5362 | 5.2844 | 3.7431 |
| 13-Mar-15 | 3.5402 | 5.2763 | 3.7591 |
| 16-Mar-15 | 3.5521 | 5.2323 | 3.7312 |
| 17-Mar-15 | 3.5561 | 5.2595 | 3.7627 |
| 18-Mar-15 | 3.6028 | 5.3102 | 3.8209 |
| 19-Mar-15 | 3.5996 | 5.2875 | 3.8290 |
| 20-Mar-15 | 3.6402 | 5.3620 | 3.8669 |
| 23-Mar-15 | 3.6387 | 5.4148 | 3.9185 |
| 24-Mar-15 | 3.6847 | 5.5046 | 4.0285 |
| 26-Mar-15 | 3.6978 | 5.4936 | 4.0300 |
| 26-Mar-15 | 3.7013 | 5.5198 | 4.0666 |
| 27-Mar-15 | 3.7152 | 5.5195 | 4.0603 |
| 30-Mar-15 | 3.7302 | 5.5577 | 4.0530 |
| 31-Mar-15 | 3.7472 | 5.5483 | 4.0582 |
|  |  |  |  |
| 1-Apr-15 | 3.7657 | 5.5909 | 4.0462 |
| 2-Apr-15 | 3.7704 | 5.5951 | 4.0621 |
| 7-Apr-15 | 3.7815 | 5.6097 | 4.1122 |
| 8-Apr-15 | 3.7921 | 5.6400 | 4.1196 |
| 9-Apr-15 | 3.8132 | 5.6914 | 4.1236 |
| 10-Apr-15 | 3.8036 | 5.6069 | 4.0630 |
| 13-Apr-15 | 3.8155 | 5.5872 | 4.0466 |
| 14-Apr-15 | 3.8200 | 5.5984 | 4.0437 |
| 15-Apr-15 | 3.8137 | 5.6367 | 4.0713 |
| 16-Apr-15 | 3.8033 | 5.6224 | 4.0333 |
| 17-Apr-15 | 3.8239 | 5.7053 | 4.1024 |
| 20-Apr-15 | 3.8217 | 5.7094 | 4.1179 |
| 21-Apr-15 | 3.8024 | 5.6724 | 4.0900 |
| 22-Apr-15 | 3.8289 | 5.7215 | 4.1180 |
| 23-Apr-15 | 3.8015 | 5.7137 | 4.0742 |
| 24-Apr-15 | 3.8259 | 5.7567 | 4.1299 |
| 25-Apr-15 | 3.8351 | 5.8171 | 4.1685 |
| 28-Apr-15 | 3.8370 | 5.8452 | 4.1814 |
| 29-Apr-15 | 3.8398 | 5.8847 | 4.2114 |
| 30-Apr-15 | 3.8493 | 5.9483 | 4.2917 |
|  |  |  |  |
| 4-May-15 | 3.8511 | 5.9206 | 4.3119 |
| 5-May-15 | 3.8571 | 5.8307 | 4.3051 |
| 6-May-15 | 3.8589 | 5.8609 | 4.3178 |
| 7-May-15 | 3.8571 | 5.8788 | 4.3738 |
| 8-May-15 | 3.8660 | 5.8791 | 4.3586 |
| 11-May-15 | 3.8629 | 5.9645 | 4.3358 |
| 12-May-15 | 3.8643 | 6.0137 | 4.3100 |
| 13-May-15 | 3.8688 | 6.0621 | 4.3456 |
| 14-May-15 | 3.8828 | 6.1072 | 4.4121 |
| 15-May-15 | 3.8918 | 6.1311 | 4.4246 |
| 18-May-15 | 3.8758 | 6.1159 | 4.4270 |
| 19-May-15 | 3.8616 | 6.0581 | 4.3890 |
| 20-May-15 | 3.8735 | 6.0058 | 4.3121 |
| 21-May-15 | 3.9057 | 6.0703 | 4.3313 |
| 22-May-15 | 3.9385 | 6.1730 | 4.3819 |
| 26-May-15 | 3.9318 | 6.0959 | 4.3389 |
| 27-May-15 | 3.9662 | 6.1074 | 4.3229 |
| 28-May-15 | 3.9604 | 6.0672 | 4.3133 |
| 29-May-15 | 3.9976 | 6.1048 | 4.3609 |
|  |  |  |  |
| 1-Jun-15 | 4.0137 | 6.1270 | 4.4037 |
| 2-Jun-15 | 4.0436 | 6.1441 | 4.4043 |
| 3-Jun-15 | 4.0550 | 6.2131 | 4.5084 |
| 4-Jun-15 | 4.0902 | 6.2703 | 4.6076 |
| 5-Jun-15 | 4.0986 | 6.2938 | 4.6191 |
| 8-Jun-15 | 4.1093 | 6.2688 | 4.5691 |
| 9-Jun-15 | 4.1124 | 6.2813 | 4.6078 |
| 10-Jun-15 | 4.1171 | 6.3050 | 4.6326 |
| 11-Jun-15 | 4.1362 | 6.4295 | 4.6818 |
| 12-Jun-15 | 4.1362 | 6.4295 | 4.6818 |
| 15-Jun-15 | 4.1614 | 6.4841 | 4.6901 |
| 16-Jun-15 | 4.1845 | 6.5082 | 4.7058 |
| 17-Jun-15 | 4.2302 | 6.6108 | 4.7510 |
| 18-Jun-15 | 4.2319 | 6.6545 | 4.7650 |
| 19-Jun-15 | 4.2481 | 6.7456 | 4.8468 |
| 22-Jun-15 | 4.2694 | 6.7781 | 4.8393 |
| 23-Jun-15 | 4.2789 | 6.7698 | 4.8630 |
| 24-Jun-15 | 4.2812 | 6.7401 | 4.7877 |
| 25-Jun-15 | 4.3040 | 6.7489 | 4.8110 |
| 26-Jun-15 | 4.3079 | 6.7744 | 4.8237 |
| 29-Jun-15 | 4.3157 | 6.7920 | 4.8143 |
| 30-Jun-15 | 4.3274 | 6.8208 | 4.8424 |
|  |  |  |  |
| 2-Jul-15 | 4.3364 | 6.8335 | 4.8489 |
| 3-Jul-15 | 4.1914 | 6.5434 | 0.3420 |
| 6-Jul-15 | 4.0217 | 6.2650 | 4.0584 |
| 7-Jul-15 | 3.9302 | 6.1386 | 4.3527 |
| 8-Jul-15 | 3.7918 | 5.8553 | 4.1573 |
| 9-Jul-15 | 3.6680 | 5.6284 | 4.0584 |
| 10-Jul-15 | 3.5463 | 5.4576 | 3.9135 |
| 13-Jul-15 | 3.4613 | 5.3605 | 3.8583 |
| 14-Jul-15 | 3.3347 | 5.1725 | 3.6782 |
| 15-Jul-15 | 3.3126 | 5.1595 | 3.6457 |
| 16-Jul-15 | 3.3111 | 5.1688 | 3.6269 |
| 17-Jul-15 | 3.2545 | 5.0753 | 3.5453 |
| 21-Jul-15 | 3.2360 | 5.0571 | 3.5326 |
| 22-Jul-15 | 3.2660 | 5.0807 | 3.5695 |
| 23-Jul-15 | 3.2780 | 5.1200 | 3.5717 |
| 24-Jul-15 | 3.2866 | 5.1047 | 3.6064 |
| 27-Jul-15 | 3.2906 | 5.1039 | 3.6095 |
| 28-Jul-15 | 3.3669 | 5.2403 | 3.7418 |
| 29-Jul-15 | 3.4121 | 5.3258 | 3.7690 |
| 30-Jul-15 | 3.4251 | 5.3505 | 3.7760 |
| 31-Jul-15 | 3.4546 | 5.3818 | 3.5733 |
|  |  |  |  |
| 3-Aug-15 | 3.4649 | 5.4211 | 3.8256 |
| 4-Aug-15 | 3.5552 | 5.5452 | 3.8948 |
| 5-Aug-15 | 3.5926 | 5.6135 | 3.9415 |
| 6-Aug-15 | 3.6757 | 5.7323 | 3.9963 |
| 7-Aug-15 | 3.7214 | 5.7752 | 4.0681 |
| 10-Aug-15 | 3.7577 | 5.8096 | 4.1127 |
| 11-Aug-15 | 3.7803 | 5.8742 | 4.1534 |
| 12-Aug-15 | 3.7972 | 5.9083 | 4.1836 |
| 13-Aug-15 | 3.8269 | 5.9880 | 4.2868 |
| 14-Aug-15 | 3.8732 | 6.0357 | 4.3137 |
| 17-Aug-15 | 3.9101 | 6.1060 | 4.3451 |
| 18-Aug-15 | 3.9237 | 6.1184 | 4.3473 |
| 19-Aug-15 | 3.9397 | 6.1660 | 4.3443 |
| 20-Aug-15 | 3.9621 | 6.2003 | 4.3843 |
| 21-Aug-15 | 3.9797 | 6.2424 | 4.4558 |
| 24-Aug-15 | 4.0192 | 6.2979 | 4.5569 |
| 25-Aug-15 | 4.0346 | 6.3467 | 4.6679 |
| 26-Aug-15 | 4.0486 | 6.3547 | 4.6210 |
| 27-Aug-15 | 4.0600 | 6.3164 | 4.6233 |
| 28-Aug-15 | 4.0671 | 6.2600 | 4.5621 |
| 31-Aug-15 | 4.0456 | 6.2173 | 4.5446 |
|  |  |  |  |
| 1-Sep-15 | 3.9231 | 6.0261 | 4.3938 |
| 2-Sep-15 | 3.7798 | 5.7971 | 4.2540 |
| 3-Sep-15 | 3.7412 | 5.7288 | 4.2071 |
| 4-Sep-15 | 3.7047 | 5.6398 | 4.1119 |
| 7-Sep-15 | 3.7083 | 5.6338 | 4.1243 |
| 8-Sep-15 | 3.7083 | 5.6634 | 4.1397 |
| 9-Sep-15 | 3.7141 | 5.7076 | 4.1548 |
| 10-Sep-15 | 3.7202 | 5.7138 | 4.1507 |
| 11-Sep-15 | 3.7252 | 5.7482 | 4.1757 |
| 14-Sep-15 | 3.7252 | 5.7413 | 4.2067 |
| 15-Sep-15 | 3.7861 | 5.8257 | 4.2772 |
| 16-Sep-15 | 3.8074 | 5.8547 | 4.3043 |
| 17-Sep-15 | 3.8323 | 5.9479 | 4.3329 |
| 18-Sep-15 | 3.8586 | 5.9845 | 4.3637 |
| 22-Sep-15 | 3.7994 | 5.9964 | 4.3762 |
| 23-Sep-15 | 3.8300 | 5.8961 | 4.2707 |
| 25-Sep-15 | 3.8108 | 5.8054 | 4.2512 |
| 28-Sep-15 | 3.7931 | 5.7568 | 4.2489 |
| 29-Sep-15 | 3.7779 | 5.7377 | 4.2349 |
| 30-Sep-15 | 3.7545 | 5.6956 | 4.2257 |
|  |  |  |  |
| 1-Oct-15 | 3.7253 | 5.6328 | 4.1591 |
| 2-Oct-15 | 3.7113 | 5.6256 | 4.1553 |
| 5-Oct-15 | 3.7197 | 5.6622 | 4.1924 |
| 6-Oct-15 | 3.7080 | 5.6293 | 4.1587 |
| 7-Oct-15 | 3.7242 | 5.6696 | 4.1944 |
| 8-Oct-15 | 3.7419 | 5.7339 | 4.2115 |
| 9-Oct-15 | 3.7512 | 5.7484 | 4.2327 |
| 12-Oct-15 | 3.7653 | 5.7662 | 0.2821 |
| 13-Oct-15 | 3.7573 | 5.7636 | 4.2684 |
| 14-Oct-15 | 3.7656 | 5.7333 | 4.2802 |
| 15-Oct-15 | 3.7672 | 5.8111 | 4.3064 |
| 16-Oct-15 | 3.7715 | 5.8238 | 4.2924 |
| 19-Oct-15 | 3.7754 | 5.8279 | 4.2872 |
| 20-Oct-15 | 3.8034 | 5.8860 | 4.3067 |
| 21-Oct-15 | 3.7993 | 5.8777 | 4.3130 |
| 22-Oct-15 | 3.7994 | 5.8746 | 4.3123 |
| 23-Oct-15 | 3.7952 | 5.8458 | 4.2329 |
| 26-Oct-15 | 3.7865 | 5.8077 | 4.1711 |
| 27-Oct-15 | 3.7913 | 5.8218 | 4.1822 |
| 28-Oct-15 | 3.7775 | 5.7900 | 4.1777 |
| 29-Oct-15 | 3.7856 | 5.7935 | 4.1868 |
| 30-Oct-15 | 3.7854 | 5.7858 | 4.1526 |
|  |  |  |  |
| 2-Nov-15 | 3.7896 | 5.8282 | 4.1924 |
| 3-Nov-15 | 3.7925 | 5.8617 | 4.1865 |
| 4-Nov-15 | 3.7898 | 5.8259 | 4.1550 |
| 5-Nov-15 | 3.7899 | 5.8312 | 4.1302 |
| 6-Nov-15 | 3.7900 | 5.7732 | 4.1244 |
| 9-Nov-15 | 3.7923 | 5.7108 | 4.0664 |
| 10-Nov-15 | 3.7913 | 5.7196 | 4.0689 |
| 11-Nov-15 | 3.7904 | 5.7315 | 4.0540 |
| 12-Nov-15 | 3.7913 | 5.7583 | 4.0709 |
| 13-Nov-15 | 3.7933 | 5.7700 | 4.0769 |
| 16-Nov-15 | 3.7919 | 5.7637 | 4.0700 |
| 17-Nov-15 | 3.7852 | 5.7522 | 4.0524 |
| 18-Nov-15 | 3.7896 | 5.7612 | 4.0404 |
| 19-Nov-15 | 3.7899 | 5.7626 | 4.0409 |
| 20-Nov-15 | 3.7854 | 5.7866 | 4.0545 |
| 23-Nov-15 | 3.7879 | 5.7730 | 4.0509 |
| 24-Nov-15 | 3.7865 | 5.7339 | 4.0261 |
| 25-Nov-15 | 3.7913 | 5.7152 | 4.0394 |
| 26-Nov-15 | 3.7946 | 5.7259 | 4.0155 |
| 27-Nov-15 | 3.7946 | 5.7341 | 4.0289 |
| 30-Nov-15 | 3.7861 | 5.7009 | 4.0074 |
|  |  |  |  |
| 1-Dec-15 | 3.7932 | 5.7103 | 4.0072 |
| 2-Dec-15 | 3.7815 | 5.6991 | 4.0162 |
| 3-Dec-15 | 3.7815 | 5.6456 | 3.9918 |
| 7-Dec-15 | 3.7955 | 5.7122 | 4.1175 |
| 8-Dec-15 | 3.7959 | 5.7205 | 4.1179 |
| 9-Dec-15 | 3.7986 | 5.6914 | 4.1308 |
| 10-Dec-15 | 3.7922 | 5.7560 | 4.1649 |
| 11-Dec-15 | 3.7970 | 5.7648 | 4.1547 |
| 14-Dec-15 | 3.7960 | 5.7747 | 4.1704 |
| 15-Dec-15 | 3.7919 | 5.7338 | 4.1814 |
| 16-Dec-15 | 3.7985 | 5.7645 | 4.1605 |
| 17-Dec-15 | 3.7980 | 5.7071 | 4.1518 |
| 18-Dec-15 | 3.7992 | 5.6621 | 4.1179 |
| 21-Dec-15 | 3.7902 | 5.6525 | 4.1128 |
| 22-Dec-15 | 3.7972 | 5.6624 | 4.1351 |
| 23-Dec-15 | 3.7932 | 5.6299 | 4.1646 |
| 24-Dec-15 | 3.7894 | 5.6386 | 4.1327 |
| 29-Dec-15 | 3.7978 | 5.6631 | 4.1567 |
| 30-Dec-15 | 3.7998 | 5.6279 | 4.1531 |
| 31-Dec-15 | 3.7944 | 5.6265 | 4.1514 |
|  |  |  |  |
|  |  |  |  |
| 4-Jan-16 | 3.7950 | 5.6165 | 4.1320 |
| 5-Jan-16 | 3.7823 | 5.5690 | 4.0992 |
| 6-Jan-16 | 3.7919 | 5.5656 | 4.0760 |
| 7-Jan-16 | 3.7967 | 5.5522 | 4.0803 |
| 8-Jan-16 | 3.7969 | 5.5420 | 4.1225 |
| 11-Jan-16 | 3.7986 | 5.5327 | 4.1384 |
| 12-Jan-16 | 3.7890 | 5.5124 | 4.1165 |
| 13-Jan-16 | 3.7991 | 5.4679 | 4.1214 |
| 14-Jan-16 | 3.8014 | 5.4866 | 4.1259 |
| 15-Jan-16 | 3.8060 | 5.4875 | 4.1530 |
| 18-Jan-16 | 3.8074 | 5.4487 | 4.1718 |
| 19-Jan-16 | 3.8083 | 5.4391 | 4.1499 |
| 20-Jan-16 | 3.8143 | 5.3940 | 4.1549 |
| 21-Jan-16 | 3.8146 | 5.4166 | 4.1543 |
| 22-Jan-16 | 3.8148 | 5.3852 | 4.1307 |
| 25-Jan-16 | 3.8195 | 5.4827 | 4.1286 |
| 26-Jan-16 | 3.8245 | 5.4505 | 4.1421 |
| 27-Jan-16 | 3.8289 | 5.4614 | 4.1456 |
| 28-Jan-16 | 3.8311 | 5.4871 | 4.1727 |
| 29-Jan-16 | 3.8311 | 5.4945 | 4.1825 |
|  |  |  |  |
| 1-Feb-16 | 3.8344 | 5.4541 | 4.1530 |
| 2-Feb-16 | 3.8391 | 5.5039 | 4.1850 |
| 3-Feb-16 | 3.8447 | 5.5391 | 4.2049 |
| 4-Feb-16 | 3.8467 | 5.5952 | 4.2546 |
| 5-Feb-16 | 3.8526 | 5.6174 | 4.3034 |
| 8-Feb-16 | 3.8588 | 5.5957 | 4.3098 |
| 9-Feb-16 | 3.8609 | 5.5537 | 4.2952 |
| 10-Feb-16 | 3.8680 | 5.5754 | 4.3684 |
| 11-Feb-16 | 3.8737 | 5.6011 | 4.3282 |
| 12-Feb-16 | 3.8780 | 5.6123 | 4.3930 |
| 15-Feb-16 | 3.8805 | 5.6120 | 4.3704 |
| 16-Feb-16 | 3.8805 | 5.6010 | 4.3215 |
| 17-Feb-16 | 3.8765 | 5.5415 | 4.3178 |
| 18-Feb-16 | 3.8860 | 5.5387 | 4.3221 |
| 19-Feb-16 | 3.8871 | 5.5847 | 4.3175 |
| 22-Feb-16 | 3.8877 | 5.5006 | 4.3079 |
| 23-Feb-16 | 3.8938 | 5.5029 | 4.2936 |
| 24-Feb-16 | 3.9041 | 5.5095 | 4.2998 |
| 25-Feb-16 | 3.9025 | 5.4304 | 4.2841 |
| 26-Feb-16 | 3.8754 | 5.3983 | 4.2617 |
| 29-Feb-16 | 3.8787 | 5.4068 | 4.2525 |
|  |  |  |  |
| 1-Mar-16 | 3.8781 | 5.3866 | 4.2192 |
| 2-Mar-16 | 3.8741 | 5.3961 | 4.2054 |
| 3-Mar-16 | 3.8750 | 5.4444 | 4.1993 |
| 4-Mar-16 | 3.8679 | 5.4538 | 4.2202 |
| 8-Mar-16 | 3.8593 | 5.4823 | 4.2448 |
| 9-Mar-16 | 3.8594 | 5.4823 | 4.2594 |
| 10-Mar-16 | 3.8478 | 5.4625 | 4.2191 |
| 11-Mar-16 | 3.8508 | 5.5107 | 4.2934 |
| 14-Mar-16 | 3.8458 | 5.5135 | 4.2822 |
| 15-Mar-16 | 3.8439 | 5.5087 | 4.2718 |
| 16-Mar-16 | 3.8424 | 5.4427 | 4.2670 |
| 17-Mar-16 | 3.8430 | 5.4131 | 4.2511 |
| 18-Mar-16 | 3.8470 | 5.5628 | 4.3486 |
| 21-Mar-16 | 3.8483 | 5.5760 | 4.3459 |
| 22-Mar-16 | 3.8485 | 5.5376 | 4.3329 |
| 23-Mar-16 | 3.8481 | 5.4720 | 4.3194 |
| 24-Mar-16 | 3.8345 | 5.4142 | 4.2871 |
| 29-Mar-16 | 3.8387 | 5.4293 | 4.2875 |
| 30-Mar-16 | 3.8364 | 5.4786 | 4.2939 |
| 31-Mar-16 | 3.8304 | 5.5252 | 4.3456 |
|  |  |  |  |
| 1-Apr-16 | 3.8365 | 5.5161 | 4.3710 |
| 4-Apr-16 | 3.8304 | 5.4331 | 4.3479 |
| 5-Apr-16 | 3.8208 | 5.4534 | 4.3500 |
| 6-Apr-16 | 3.8302 | 5.4140 | 4.3558 |
| 7-Apr-16 | 3.8300 | 5.4002 | 4.3580 |
| 8-Apr-16 | 3.8294 | 5.3968 | 4.3628 |
| 11-Apr-16 | 3.8237 | 5.3930 | 4.3604 |
| 12-Apr-16 | 3.8287 | 5.4624 | 4.3812 |
| 13-Apr-16 | 3.8232 | 5.4462 | 4.3542 |
| 14-Apr-16 | 3.8295 | 5.4456 | 4.3205 |
| 15-Apr-16 | 3.8246 | 5.4126 | 4.3070 |
| 18-Apr-16 | 3.8232 | 5.4252 | 4.3256 |
| 19-Apr-16 | 3.8262 | 5.4581 | 4.3330 |
| 20-Apr-16 | 3.8254 | 5.5102 | 4.3501 |
| 21-Apr-16 | 3.8232 | 5.5054 | 4.3326 |
| 22-Apr-16 | 3.8174 | 5.4732 | 4.3144 |
| 25-Apr-16 | 3.8102 | 5.4896 | 4.2867 |
| 26-Apr-16 | 3.8051 | 5.5134 | 4.2883 |
| 27-Apr-16 | 3.7940 | 5.5330 | 4.2930 |
| 28-Apr-16 | 3.7970 | 5.5199 | 4.2928 |
| 29-Apr-16 | 3.7951 | 5.5361 | 4.2986 |
|  |  |  |  |
| 3-May-16 | 3.7848 | 5.5347 | 4.3299 |
| 4-May-16 | 3.7976 | 5.5210 | 4.3706 |
| 5-May-16 | 3.7886 | 5.4836 | 4.3535 |
| 6-May-16 | 3.8010 | 5.5056 | 4.3302 |
| 9-May-16 | 3.8051 | 5.4967 | 4.3421 |
| 10-May-16 | 3.8071 | 5.4847 | 4.3404 |
| 11-May-16 | 3.8079 | 5.5114 | 4.3428 |
| 12-May-16 | 3.8076 | 5.5138 | 4.3579 |
| 13-May-16 | 3.8063 | 5.5098 | 4.3347 |
| 16-May-16 | 3.8115 | 5.4748 | 4.3030 |
| 17-May-16 | 3.8093 | 5.4900 | 4.3164 |
| 18-May-16 | 3.8133 | 5.5211 | 4.3220 |
| 19-May-16 | 3.8150 | 5.5737 | 4.3014 |
| 20-May-16 | 3.8182 | 5.5723 | 4.2805 |
| 23-May-16 | 3.8238 | 5.5571 | 4.2869 |
| 24-May-16 | 3.8268 | 5.5412 | 4.2877 |
| 26-May-16 | 3.8286 | 5.5947 | 4.2713 |
| 27-May-16 | 3.8291 | 5.6181 | 4.2797 |
| 30-May-16 | 3.8337 | 5.6057 | 4.2661 |
| 31-May-16 | 3.8337 | 5.6097 | 4.2700 |
|  |  |  |  |
| 1-Jun-16 | 3.8416 | 5.6209 | 4.2870 |
| 2-Jun-16 | 3.8375 | 5.5239 | 4.2815 |
| 3-Jun-16 | 3.8402 | 5.5423 | 4.2846 |
| 6-Jun-16 | 3.8452 | 5.5872 | 4.3565 |
| 7-Jun-16 | 3.8536 | 5.5679 | 4.3745 |
| 8-Jun-16 | 3.8577 | 5.6160 | 4.3827 |
| 9-Jun-16 | 3.8638 | 5.6249 | 4.4031 |
| 10-Jun-16 | 3.8691 | 5.5928 | 4.3798 |
| 13-Jun-16 | 3.8706 | 5.5540 | 4.3646 |
| 14-Jun-16 | 3.8740 | 5.5327 | 4.3778 |
| 15-Jun-16 | 3.8812 | 5.4756 | 4.3502 |
| 16-Jun-16 | 3.8988 | 5.5334 | 4.3827 |
| 17-Jun-16 | 3.8977 | 5.4821 | 4.3423 |
| 20-Jun-16 | 3.8994 | 5.5709 | 4.3870 |
| 21-Jun-16 | 3.9024 | 5.7303 | 4.4164 |
| 22-Jun-16 | 3.9032 | 5.7291 | 4.3984 |
| 23-Jun-16 | 3.9049 | 5.7282 | 4.4090 |
| 24-Jun-16 | 3.9070 | 5.7890 | 4.4427 |
| 27-Jun-16 | 3.9079 | 5.3249 | 4.3431 |
| 28-Jun-16 | 3.9159 | 5.1739 | 4.3168 |
| 29-Jun-16 | 3.9190 | 5.2126 | 4.3285 |
| 30-Jun-16 | 3.9230 | 5.3052 | 4.3623 |
|  |  |  |  |
| 4-Jul-16 | 3.9260 | 5.2080 | 4.3460 |
| 5-Jul-16 | 3.9260 | 5.2178 | 4.3730 |
| 7-Jul-16 | 3.9296 | 5.1163 | 4.3519 |
| 8-Jul-16 | 3.9307 | 5.0795 | 4.3488 |
| 11-Jul-16 | 3.9333 | 5.0875 | 4.3405 |
| 12-Jul-16 | 3.9352 | 5.1105 | 4.3484 |
| 13-Jul-16 | 3.9365 | 5.2110 | 4.3592 |
| 14-Jul-16 | 3.9389 | 5.2003 | 4.3765 |
| 15-Jul-16 | 3.9405 | 5.2529 | 4.3844 |
| 18-Jul-16 | 3.9412 | 5.1888 | 4.3600 |
| 19-Jul-16 | 3.9429 | 5.2321 | 4.3632 |
| 20-Jul-16 | 3.9444 | 5.1804 | 4.3416 |
| 21-Jul-16 | 3.9455 | 5.1992 | 4.3439 |
| 22-Jul-16 | 3.9447 | 5.2090 | 4.3419 |
| 25-Jul-16 | 3.9406 | 5.1570 | 4.3180 |
| 26-Jul-16 | 3.9406 | 5.1764 | 4.3302 |
| 27-Jul-16 | 3.9412 | 5.1746 | 4.3290 |
| 28-Jul-16 | 3.9463 | 5.1673 | 4.3369 |
| 29-Jul-16 | 3.9469 | 5.1831 | 4.3756 |
|  |  |  |  |
| 1-Aug-16 | 3.9451 | 5.2389 | 4.4135 |
| 2-Aug-16 | 3.9463 | 5.2129 | 4.4102 |
| 3-Aug-16 | 3.9465 | 5.2558 | 4.4304 |
| 4-Aug-16 | 3.9466 | 5.2565 | 4.4096 |
| 5-Aug-16 | 3.9466 | 5.1805 | 4.3959 |
| 8-Aug-16 | 3.9449 | 5.1552 | 4.3707 |
| 9-Aug-16 | 3.9461 | 5.1457 | 4.3719 |
| 10-Aug-16 | 3.9470 | 5.1331 | 4.3861 |
| 11-Aug-16 | 3.9454 | 5.1323 | 4.4035 |
| 12-Aug-16 | 3.9420 | 5.1100 | 4.4046 |
| 15-Aug-16 | 3.9406 | 5.0993 | 4.4066 |
| 16-Aug-16 | 3.9423 | 5.0799 | 4.4140 |
| 17-Aug-16 | 3.9432 | 5.1201 | 4.4422 |
| 18-Aug-16 | 3.9437 | 5.1281 | 4.4457 |
| 19-Aug-16 | 3.9439 | 5.1886 | 4.4668 |
| 22-Aug-16 | 3.9447 | 5.1500 | 4.4669 |
| 23-Aug-16 | 3.9455 | 5.1832 | 4.4671 |
| 24-Aug-16 | 3.9460 | 5.2034 | 4.4676 |
| 25-Aug-16 | 3.9466 | 5.2261 | 4.4405 |
| 26-Aug-16 | 3.9473 | 5.2069 | 4.4537 |
| 29-Aug-16 | 3.9463 | 5.2044 | 4.4436 |
| 30-Aug-16 | 3.9440 | 5.1582 | 4.4055 |
| 31-Aug-16 | 3.9445 | 5.1612 | 4.3968 |
|  |  |  |  |
| 1-Sep-16 | 3.9456 | 5.1713 | 4.3963 |
| 2-Sep-16 | 3.9463 | 5.2463 | 4.4168 |
| 5-Sep-16 | 3.9464 | 5.2485 | 4.4044 |
| 6-Sep-16 | 3.9454 | 5.2534 | 4.3991 |
| 7-Sep-16 | 3.9471 | 5.2920 | 4.4307 |
| 8-Sep-16 | 3.9499 | 5.2737 | 4.4397 |
| 9-Sep-16 | 3.9518 | 5.2560 | 4.4481 |
| 13-Sep-16 | 3.9544 | 5.2422 | 4.4344 |
| 14-Sep-16 | 3.9546 | 5.2128 | 4.4449 |
| 15-Sep-16 | 3.9550 | 5.2206 | 4.4520 |
| 16-Sep-16 | 3.9559 | 5.2246 | 4.4476 |
| 19-Sep-16 | 3.9564 | 5.1777 | 4.4135 |
| 20-Sep-16 | 3.9572 | 5.1663 | 4.4232 |
| 22-Sep-16 | 3.9594 | 5.1324 | 4.4245 |
| 23-Sep-16 | 3.9623 | 5.1845 | 4.4506 |
| 26-Sep-16 | 3.9644 | 5.1397 | 4.4496 |
| 27-Sep-16 | 3.9664 | 5.1503 | 4.4716 |
| 28-Sep-16 | 3.9673 | 5.1569 | 4.4423 |
| 29-Sep-16 | 3.9703 | 5.1568 | 4.4427 |
| 30-Sep-16 | 3.9709 | 5.1576 | 4.4653 |
|  |  |  |  |
| 3-Oct-16 | 3.9715 | 5.1520 | 4.4545 |
| 4-Oct-16 | 3.9736 | 5.1017 | 4.4584 |
| 5-Oct-16 | 3.9716 | 5.0634 | 4.4317 |
| 6-Oct-16 | 3.9726 | 5.0572 | 4.4482 |
| 7-Oct-16 | 3.9725 | 5.0239 | 4.4373 |
| 10-Oct-16 | 3.9717 | 4.9466 | 4.4376 |
| 11-Oct-16 | 3.9709 | 4.9152 | 4.4291 |
| 12-Oct-16 | 3.9691 | 4.8505 | 4.3926 |
| 13-Oct-16 | 3.9686 | 4.8478 | 4.3699 |
| 14-Oct-16 | 3.9686 | 4.8425 | 4.3813 |
| 17-Oct-16 | 3.9674 | 4.8339 | 4.3653 |
| 18-Oct-16 | 3.9638 | 4.8295 | 4.3581 |
| 19-Oct-16 | 3.9409 | 4.8736 | 4.3497 |
| 20-Oct-16 | 3.9638 | 4.8704 | 4.3477 |
| 21-Oct-16 | 3.9641 | 4.8531 | 4.3300 |
| 24-Oct-16 | 3.9641 | 4.8360 | 4.3115 |
| 25-Oct-16 | 3.9642 | 4.8387 | 4.3149 |
| 26-Oct-16 | 3.9644 | 4.8102 | 4.3063 |
| 27-Oct-16 | 3.9645 | 4.8491 | 4.3281 |
| 28-Oct-16 | 3.9651 | 4.8317 | 4.3305 |
| 31-Oct-16 | 3.9643 | 4.8184 | 4.3345 |
|  |  |  |  |
| 1-Nov-16 | 3.9641 | 4.8196 | 4.3357 |
| 2-Nov-16 | 3.9638 | 4.8539 | 4.3790 |
| 3-Nov-16 | 3.9640 | 4.8777 | 4.4037 |
| 4-Nov-16 | 3.9640 | 4.9364 | 4.3973 |
| 7-Nov-16 | 3.9643 | 4.9674 | 4.4069 |
| 8-Nov-16 | 3.9650 | 4.9140 | 4.3811 |
| 9-Nov-16 | 3.9651 | 4.9090 | 4.3813 |
| 10-Nov-16 | 3.9651 | 4.9106 | 4.3457 |
| 11-Nov-16 | 3.9653 | 4.9489 | 4.3115 |
| 14-Nov-16 | 3.9653 | 5.0072 | 4.3119 |
| 15-Nov-16 | 3.9683 | 4.9530 | 4.2532 |
| 16-Nov-16 | 3.9724 | 4.9232 | 4.2605 |
| 17-Nov-16 | 3.9761 | 4.9465 | 4.2552 |
| 18-Nov-16 | 3.9769 | 4.9526 | 4.2532 |
| 21-Nov-16 | 3.9773 | 4.9076 | 4.2162 |
| 22-Nov-16 | 3.9778 | 4.9671 | 4.2275 |
| 23-Nov-16 | 3.9786 | 4.9464 | 4.2268 |
| 24-Nov-16 | 3.9793 | 4.9266 | 4.1955 |
| 25-Nov-16 | 3.9793 | 4.9666 | 4.2059 |
| 28-Nov-16 | 3.9796 | 4.9477 | 4.2223 |
| 29-Nov-16 | 3.9799 | 4.9385 | 4.2130 |
| 30-Nov-16 | 3.9805 | 4.9754 | 4.2196 |
|  |  |  |  |
| 1-Dec-16 | 4.0316 | 5.0153 | 4.2695 |
| 5-Dec-16 | 4.0322 | 5.0919 | 4.2725 |
| 6-Dec-16 | 4.0325 | 5.1296 | 4.3293 |
| 7-Dec-16 | 4.0364 | 5.1410 | 4.3304 |
| 8-Dec-16 | 4.0364 | 5.0938 | 4.3311 |
| 9-Dec-16 | 4.0377 | 5.0716 | 4.2832 |
| 12-Dec-16 | 4.0394 | 5.0834 | 4.2612 |
| 13-Dec-16 | 4.0692 | 5.1537 | 4.3183 |
| 14-Dec-16 | 4.0954 | 5.2082 | 4.3568 |
| 15-Dec-16 | 4.0994 | 5.2066 | 4.3650 |
| 16-Dec-16 | 4.1049 | 5.1211 | 4.2779 |
| 19-Dec-16 | 4.1105 | 5.1032 | 4.2852 |
| 20-Dec-16 | 4.1187 | 5.0938 | 4.3016 |
| 21-Dec-16 | 4.1231 | 5.0831 | 4.2777 |
| 22-Dec-16 | 4.1336 | 5.1197 | 4.3184 |
| 23-Dec-16 | 4.1462 | 5.1139 | 4.3438 |
| 28-Dec-16 | 4.1521 | 5.0847 | 4.3331 |
| 29-Dec-16 | 4.1811 | 5.1154 | 4.3813 |
| 30-Dec-16 | 4.2002 | 5.1965 | 4.4367 |
|  |  |  |  |
|  |  |  |  |
| 3-Jan-17 | 4.2077 | 5.1559 | 4.3741 |
| 4-Jan-17 | 4.2097 | 5.1716 | 4.4044 |
| 5-Jan-17 | 4.2101 | 5.1875 | 4.4376 |
| 6-Jan-17 | 4.2150 | 5.1965 | 4.4490 |
| 9-Jan-17 | 4.2162 | 5.1178 | 4.4386 |
| 10-Jan-17 | 4.2190 | 5.1284 | 4.4688 |
| 11-Jan-17 | 4.2238 | 5.1573 | 4.4650 |
| 12-Jan-17 | 4.2254 | 5.1871 | 4.5023 |
| 13-Jan-17 | 4.2275 | 5.1263 | 4.4828 |
| 16-Jan-17 | 4.2275 | 5.1020 | 4.4825 |
| 17-Jan-17 | 4.2306 | 5.2413 | 4.5338 |
| 18-Jan-17 | 4.2329 | 5.2119 | 4.5237 |
| 19-Jan-17 | 4.2347 | 5.2085 | 4.4912 |
| 20-Jan-17 | 4.2376 | 5.2186 | 4.5222 |
| 23-Jan-17 | 4.2404 | 5.2861 | 4.5497 |
| 24-Jan-17 | 4.2430 | 5.2955 | 4.5649 |
| 25-Jan-17 | 4.2667 | 5.3671 | 4.5794 |
| 26-Jan-17 | 4.2681 | 5.3710 | 4.5625 |
| 27-Jan-17 | 4.2689 | 5.3628 | 4.5697 |
| 30-Jan-17 | 4.2706 | 5.3427 | 4.5539 |
| 31-Jan-17 | 4.2711 | 5.3489 | 4.6073 |
|  |  |  |  |
| 1-Feb-17 | 4.2810 | 5.4127 | 4.5987 |
| 2-Feb-17 | 4.2913 | 5.3877 | 4.6416 |
| 3-Feb-17 | 4.3004 | 5.3619 | 4.6293 |
| 6-Feb-17 | 4.3043 | 5.3526 | 4.6155 |
| 7-Feb-17 | 4.3142 | 5.3411 | 4.6038 |
| 8-Feb-17 | 4.3635 | 5.4627 | 4.6670 |
| 9-Feb-17 | 4.3712 | 5.4859 | 4.6603 |
| 10-Feb-17 | 4.3724 | 5.4500 | 4.6492 |
| 13-Feb-17 | 4.3730 | 5.4645 | 4.6368 |
| 14-Feb-17 | 4.3734 | 5.4561 | 4.6417 |
| 15-Feb-17 | 4.3737 | 5.4472 | 4.6245 |
| 16-Feb-17 | 4.3744 | 5.4636 | 4.6634 |
| 17-Feb-17 | 4.3750 | 5.4357 | 4.6533 |
| 20-Feb-17 | 4.3750 | 5.4576 | 4.6480 |
| 21-Feb-17 | 4.3760 | 5.4451 | 4.6143 |
| 22-Feb-17 | 4.4263 | 5.5150 | 4.6514 |
| 23-Feb-17 | 4.4363 | 5.5467 | 4.6918 |
| 24-Feb-17 | 4.4399 | 5.5551 | 4.6974 |
| 27-Feb-17 | 4.4594 | 5.5439 | 4.7287 |
| 28-Feb-17 | 4.4786 | 5.5745 | 4.7530 |
|  |  |  |  |
| 1-Mar-17 | 4.4970 | 5.5332 | 4.7397 |
| 2-Mar-17 | 4.5038 | 5.5309 | 4.7350 |
| 3-Mar-17 | 4.5092 | 5.5204 | 4.7610 |
| 7-Mar-17 | 4.5420 | 5.5288 | 4.7991 |
| 8-Mar-17 | 4.6042 | 5.6043 | 4.8612 |
| 9-Mar-17 | 4.6039 | 5.6092 | 4.8790 |
| 10-Mar-17 | 4.6030 | 5.5952 | 4.8922 |
| 13-Mar-17 | 4.5939 | 5.6154 | 4.9000 |
| 14-Mar-17 | 4.5819 | 5.5663 | 4.8746 |
| 15-Mar-17 | 4.5739 | 5.5879 | 4.8639 |
| 16-Mar-17 | 4.5559 | 5.6323 | 4.8906 |
| 17-Mar-17 | 4.5446 | 5.6198 | 4.8817 |
| 20-Mar-17 | 4.5201 | 5.5975 | 4.8604 |
| 21-Mar-17 | 4.4945 | 5.6033 | 4.8572 |
| 22-Mar-17 | 4.4790 | 5.5813 | 4.8422 |
| 23-Mar-17 | 4.4216 | 5.5290 | 4.7643 |
| 24-Mar-17 | 4.3506 | 5.4274 | 4.6982 |
| 27-Mar-17 | 4.3429 | 5.4620 | 4.7263 |
| 28-Mar-17 | 4.3376 | 5.4294 | 4.7104 |
| 29-Mar-17 | 4.3369 | 5.3800 | 4.6612 |
| 30-Mar-17 | 4.3384 | 5.4222 | 4.6560 |
| 31-Mar-17 | 4.3173 | 5.3964 | 4.6164 |
|  |  |  |  |
| 3-Apr-17 | 4.2917 | 5.3546 | 4.5695 |
| 4-Apr-17 | 4.2753 | 5.3206 | 4.5561 |
| 5-Apr-17 | 4.1641 | 5.1968 | 4.4413 |
| 6-Apr-17 | 4.1947 | 5.2421 | 4.4726 |
| 7-Apr-17 | 4.1860 | 5.1882 | 4.4434 |
| 10-Apr-17 | 4.1915 | 5.2084 | 4.4440 |
| 11-Apr-17 | 4.2084 | 5.2445 | 4.4697 |
| 12-Apr-17 | 4.2062 | 5.2624 | 4.4651 |
| 13-Apr-17 | 4.2103 | 5.2732 | 4.4755 |
| 18-Apr-17 | 4.2067 | 5.3693 | 4.5004 |
| 19-Apr-17 | 4.1687 | 5.3405 | 4.4663 |
| 20-Apr-17 | 4.1653 | 5.3460 | 4.4851 |
| 21-Apr-17 | 4.1627 | 5.3191 | 4.4489 |
| 24-Apr-17 | 4.1641 | 5.3217 | 4.5229 |
| 25-Apr-17 | 4.1831 | 5.3607 | 4.5699 |
| 26-Apr-17 | 4.1829 | 5.3763 | 4.5504 |
| 27-Apr-17 | 4.1874 | 5.4005 | 4.5507 |
| 28-Apr-17 | 4.1867 | 5.4163 | 4.5611 |
|  |  |  |  |
| 2-May-17 | 4.1907 | 5.4117 | 4.5673 |
| 3-May-17 | 4.1855 | 5.4032 | 4.5689 |
| 4-May-17 | 4.1946 | 5.4094 | 4.5852 |
| 5-May-17 | 4.1955 | 5.4343 | 4.6092 |
| 8-May-17 | 4.1976 | 5.4269 | 4.5839 |
| 9-May-17 | 4.2000 | 5.4325 | 4.5698 |
| 10-May-17 | 4.2004 | 5.4324 | 4.5612 |
| 11-May-17 | 4.2018 | 5.4078 | 4.5637 |
| 12-May-17 | 4.2112 | 5.4252 | 4.5980 |
| 15-May-17 | 4.2191 | 5.4476 | 4.6551 |
| 16-May-17 | 4.2320 | 5.4627 | 4.6856 |
| 17-May-17 | 4.2413 | 5.4913 | 4.7239 |
| 18-May-17 | 4.2434 | 5.5181 | 4.7224 |
| 19-May-17 | 4.2505 | 5.5344 | 4.7559 |
| 22-May-17 | 4.2650 | 5.5420 | 4.7877 |
| 23-May-17 | 4.3046 | 5.5850 | 4.8314 |
| 24-May-17 | 4.3054 | 5.5731 | 4.8135 |
| 26-May-17 | 4.3067 | 5.5062 | 4.8097 |
| 29-May-17 | 4.3010 | 5.5202 | 4.8064 |
| 30-May-17 | 4.2998 | 5.5280 | 4.8038 |
| 31-May-17 | 4.2878 | 5.5360 | 4.8221 |
|  |  |  |  |
| 1-Jun-17 | 4.2865 | 5.5289 | 4.8109 |
| 2-Jun-17 | 4.2928 | 5.5306 | 4.8416 |
| 5-Jun-17 | 4.2931 | 5.5498 | 4.8302 |
| 6-Jun-17 | 4.2996 | 5.5404 | 4.8475 |
| 7-Jun-17 | 4.3019 | 5.5777 | 4.8428 |
| 8-Jun-17 | 4.3054 | 5.5723 | 4.8304 |
| 9-Jun-17 | 4.3213 | 5.5011 | 4.8329 |
| 12-Jun-17 | 4.3279 | 5.4851 | 4.8487 |
| 13-Jun-17 | 4.3375 | 5.5230 | 4.8646 |
| 14-Jun-17 | 4.3387 | 5.5496 | 4.8934 |
| 15-Jun-17 | 4.3395 | 5.5357 | 4.8408 |
| 16-Jun-17 | 4.3423 | 5.5553 | 4.8620 |
| 19-Jun-17 | 4.3443 | 5.5412 | 4.8539 |
| 20-Jun-17 | 4.3451 | 5.4881 | 4.8390 |
| 21-Jun-17 | 4.3521 | 5.5122 | 4.8503 |
| 22-Jun-17 | 4.3532 | 5.5127 | 4.8566 |
| 23-Jun-17 | 4.3540 | 5.5407 | 4.8750 |
| 27-Jun-17 | 4.3571 | 5.5662 | 4.9174 |
| 28-Jun-17 | 4.3598 | 5.6410 | 4.9534 |
| 29-Jun-17 | 4.3618 | 5.6649 | 4.9847 |
| 30-Jun-17 | 4.3629 | 5.6651 | 4.9750 |
|  |  |  |  |
| 4-Jul-17 | 4.3629 | 5.6376 | 4.9509 |
| 5-Jul-17 | 4.3640 | 5.6399 | 4.9436 |
| 6-Jul-17 | 4.3645 | 5.6573 | 4.9778 |
| 7-Jul-17 | 4.3645 | 5.6202 | 4.9706 |
| 10-Jul-17 | 4.3649 | 5.6154 | 4.9721 |
| 11-Jul-17 | 4.3562 | 5.5951 | 4.9749 |
| 12-Jul-17 | 4.3573 | 5.6153 | 4.9715 |
| 13-Jul-17 | 4.3585 | 5.6362 | 4.9702 |
| 14-Jul-17 | 4.3602 | 5.6999 | 4.9876 |
| 17-Jul-17 | 4.3615 | 5.6976 | 5.0034 |
| 18-Jul-17 | 4.3638 | 5.6804 | 5.0519 |
| 19-Jul-17 | 4.3700 | 5.6936 | 5.0330 |
| 20-Jul-17 | 4.3703 | 5.6705 | 5.0877 |
| 21-Jul-17 | 4.3722 | 5.6703 | 5.0946 |
| 24-Jul-17 | 4.3730 | 5.7043 | 5.0907 |
| 25-Jul-17 | 4.3747 | 5.7105 | 5.1110 |
| 26-Jul-17 | 4.3750 | 5.7087 | 5.0894 |
| 27-Jul-17 | 4.3778 | 5.7284 | 5.1080 |
| 28-Jul-17 | 4.3722 | 5.7370 | 5.1392 |
| 31-Jul-17 | 4.3743 | 5.7627 | 5.1573 |
|  |  |  |  |
| 1-Aug-17 | 4.3754 | 5.7900 | 5.1680 |
| 2-Aug-17 | 4.3754 | 5.7880 | 5.1903 |
| 3-Aug-17 | 4.3750 | 5.7507 | 5.1987 |
| 4-Aug-17 | 4.3758 | 5.7056 | 5.1456 |
| 7-Aug-17 | 4.3764 | 5.6972 | 5.1566 |
| 8-Aug-17 | 4.4264 | 5.6753 | 5.1372 |
| 9-Aug-17 | 4.3761 | 5.6868 | 5.1336 |
| 10-Aug-17 | 4.3761 | 5.6839 | 5.1420 |
| 11-Aug-17 | 4.3775 | 5.6788 | 5.1623 |
| 14-Aug-17 | 4.3808 | 5.6894 | 5.1626 |
| 15-Aug-17 | 4.3838 | 5.6343 | 5.1375 |
| 16-Aug-17 | 4.3848 | 5.6400 | 5.1317 |
| 17-Aug-17 | 4.3858 | 5.6509 | 5.1468 |
| 18-Aug-17 | 4.3863 | 5.6336 | 5.1512 |
| 21-Aug-17 | 4.3854 | 5.6594 | 5.1774 |
| 22-Aug-17 | 4.3883 | 5.6243 | 5.1594 |
| 23-Aug-17 | 4.3894 | 5.6167 | 5.1826 |
| 24-Aug-17 | 4.3951 | 5.6273 | 5.1836 |
| 25-Aug-17 | 4.3984 | 5.6665 | 5.2180 |
| 28-Aug-17 | 4.3990 | 5.6831 | 5.2660 |
| 29-Aug-17 | 4.3990 | 5.6879 | 5.2850 |
| 30-Aug-17 | 4.3989 | 5.6814 | 5.2399 |
| 31-Aug-17 | 4.3994 | 5.6629 | 5.2215 |
|  |  |  |  |
| 4-Sep-17 | 4.3994 | 5.6994 | 5.2368 |
| 5-Sep-17 | 4.3999 | 5.7186 | 5.2406 |
| 6-Sep-17 | 4.4021 | 5.7503 | 5.2538 |
| 7-Sep-17 | 4.4020 | 5.7658 | 5.2861 |
| 8-Sep-17 | 4.4027 | 5.8061 | 5.2961 |
| 11-Sep-17 | 4.4044 | 5.8074 | 5.2781 |
| 12-Sep-17 | 4.4051 | 5.8451 | 5.2677 |
| 13-Sep-17 | 4.4052 | 5.8274 | 5.2493 |
| 14-Sep-17 | 4.4052 | 5.8803 | 5.2311 |
| 15-Sep-17 | 4.4053 | 5.9862 | 5.2714 |
| 18-Sep-17 | 4.4067 | 5.9711 | 5.2681 |
| 19-Sep-17 | 4.4074 | 5.9590 | 5.2772 |
| 20-Sep-17 | 4.4076 | 5.9732 | 5.2863 |
| 22-Sep-17 | 4.4077 | 5.9709 | 5.2788 |
| 25-Sep-17 | 4.4073 | 5.9539 | 5.2371 |
| 26-Sep-17 | 4.4035 | 5.9183 | 5.1908 |
| 27-Sep-17 | 4.4019 | 5.8968 | 5.1679 |
| 28-Sep-17 | 4.4018 | 5.9151 | 5.1860 |
| 29-Sep-17 | 4.3944 | 5.8962 | 5.1940 |
|  |  |  |  |
| 2-Oct-17 | 4.3942 | 5.8355 | 5.1640 |
| 3-Oct-17 | 4.3949 | 5.8237 | 5.1697 |
| 4-Oct-17 | 4.3945 | 5.8354 | 5.1677 |
| 5-Oct-17 | 4.3937 | 5.7725 | 5.1533 |
| 6-Oct-17 | 4.3898 | 5.7333 | 5.1526 |
| 9-Oct-17 | 4.3898 | 5.7649 | 5.1534 |
| 10-Oct-17 | 4.3892 | 5.7911 | 5.1813 |
| 11-Oct-17 | 4.3790 | 5.7724 | 5.1847 |
| 12-Oct-17 | 4.3774 | 5.7633 | 5.1861 |
| 13-Oct-17 | 4.3783 | 5.8201 | 5.1810 |
| 16-Oct-17 | 4.3754 | 5.8106 | 5.1620 |
| 17-Oct-17 | 4.3772 | 5.7652 | 5.1432 |
| 18-Oct-17 | 4.3749 | 5.7558 | 5.1470 |
| 19-Oct-17 | 4.3774 | 5.7810 | 5.1880 |
| 20-Oct-17 | 4.3759 | 5.7758 | 5.1629 |
| 23-Oct-17 | 4.3759 | 5.7766 | 5.1416 |
| 24-Oct-17 | 4.3748 | 5.7468 | 5.1487 |
| 25-Oct-17 | 4.3752 | 5.7963 | 5.1692 |
| 26-Oct-17 | 4.3760 | 5.7632 | 5.1165 |
| 27-Oct-17 | 4.3750 | 5.7358 | 5.0746 |
| 30-Oct-17 | 4.3742 | 5.7619 | 5.0793 |
| 31-Oct-17 | 4.3765 | 5.7984 | 5.0940 |
|  |  |  |  |
| 1-Nov-17 | 4.3779 | 5.8036 | 5.0860 |
| 2-Nov-17 | 4.3800 | 5.7416 | 5.1104 |
| 3-Nov-17 | 4.3814 | 5.7267 | 5.0877 |
| 6-Nov-17 | 4.3840 | 5.7450 | 5.0801 |
| 7-Nov-17 | 4.3878 | 5.7548 | 5.0784 |
| 8-Nov-17 | 4.3897 | 5.7505 | 5.0939 |
| 9-Nov-17 | 4.3925 | 5.7573 | 5.1092 |
| 10-Nov-17 | 4.3925 | 5.8025 | 5.1223 |
| 13-Nov-17 | 4.3918 | 5.7526 | 5.1253 |
| 14-Nov-17 | 4.3927 | 5.7547 | 5.1628 |
| 15-Nov-17 | 4.3920 | 5.7838 | 5.1950 |
| 16-Nov-17 | 4.3942 | 5.7982 | 5.1762 |
| 17-Nov-17 | 4.3955 | 5.8036 | 5.1813 |
| 20-Nov-17 | 4.4005 | 5.8246 | 5.1758 |
| 21-Nov-17 | 4.4005 | 5.8318 | 5.1650 |
| 22-Nov-17 | 4.4036 | 5.8452 | 5.1849 |
| 23-Nov-17 | 4.4036 | 5.8564 | 5.2150 |
| 24-Nov-17 | 4.4065 | 5.8820 | 5.2507 |
| 27-Nov-17 | 4.4076 | 5.8828 | 5.2586 |
| 28-Nov-17 | 4.4124 | 5.8539 | 5.2422 |
| 29-Nov-17 | 4.4124 | 5.9137 | 5.2216 |
| 30-Nov-17 | 4.4122 | 5.9638 | 5.2572 |
|  |  |  |  |
| 4-Dec-17 | 4.4117 | 5.9642 | 5.2233 |
| 5-Dec-17 | 4.4117 | 5.9243 | 5.2194 |
| 6-Dec-17 | 4.4117 | 5.9060 | 5.2021 |
| 7-Dec-17 | 4.4112 | 5.9027 | 5.2015 |
| 8-Dec-17 | 4.4112 | 5.9187 | 5.1857 |
| 11-Dec-17 | 4.4122 | 5.8987 | 5.2095 |
| 12-Dec-17 | 4.4126 | 5.8829 | 5.1816 |
| 13-Dec-17 | 4.4126 | 5.9023 | 5.1868 |
| 14-Dec-17 | 4.4121 | 5.9151 | 5.2040 |
| 15-Dec-17 | 4.4121 | 5.8794 | 5.1974 |
| 18-Dec-17 | 4.4115 | 5.9108 | 5.2133 |
| 19-Dec-17 | 4.4115 | 5.8929 | 5.2143 |
| 20-Dec-17 | 4.4116 | 5.9158 | 5.2405 |
| 21-Dec-17 | 4.4116 | 5.8913 | 5.2358 |
| 22-Dec-17 | 4.4116 | 5.8992 | 5.2268 |
| 27-Dec-17 | 4.4142 | 5.9194 | 5.2552 |
| 28-Dec-17 | 4.4142 | 5.9359 | 5.2741 |
| 29-Dec-17 | 4.4157 | 5.9669 | 5.2964 |
